# Supplementary material for: High-risk neuroblastoma with NF1 loss of function is targetable using SHP2 inhibition
Source: PubMed Central journal article supplement (PMC10353975; doi:10.1016/j.celrep.2022.111095), 2022-07-26
Supplement: NIHMS1914136-supplement-1.pdf [file NIHMS1914136-supplement-1.pdf]

**Supplemental information**

**High-risk neuroblastoma with NF1 loss  
of function is targetable using SHP2 inhibition**

**Jinyang Cai, Sheeba Jacob, Richard Kurupi, Krista M. Dalton, Colin Coon, Patricia Greninger, Regina K. Egan, Giovanna T. Stein, Ellen Murchie, Joseph McClanaghan, Yuta Adachi, Kentaro Hirade, Mikhail Dozmorov, John Glod, Sosipatros A. Boikos, Hironichi Ebi, Huaixiang Hao, Giordano Caponigro, Cyril H. Benes, and Anthony C. Faber**

A

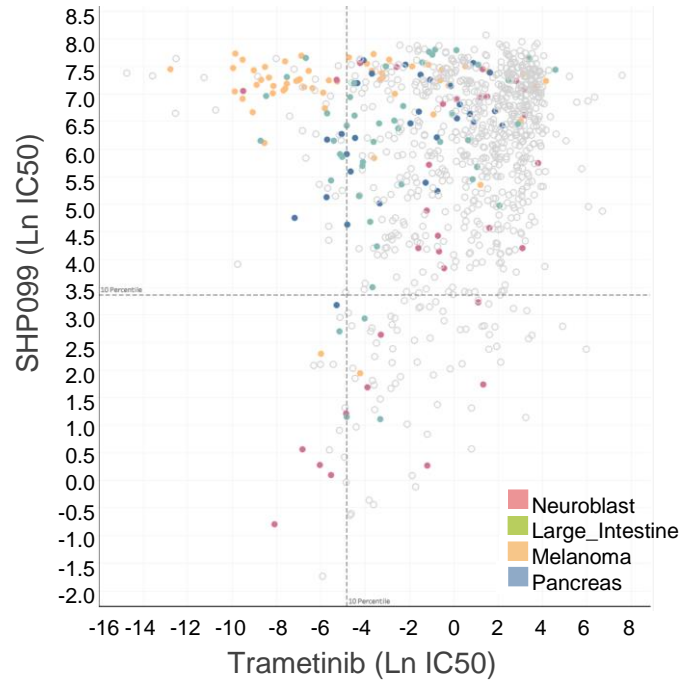

B

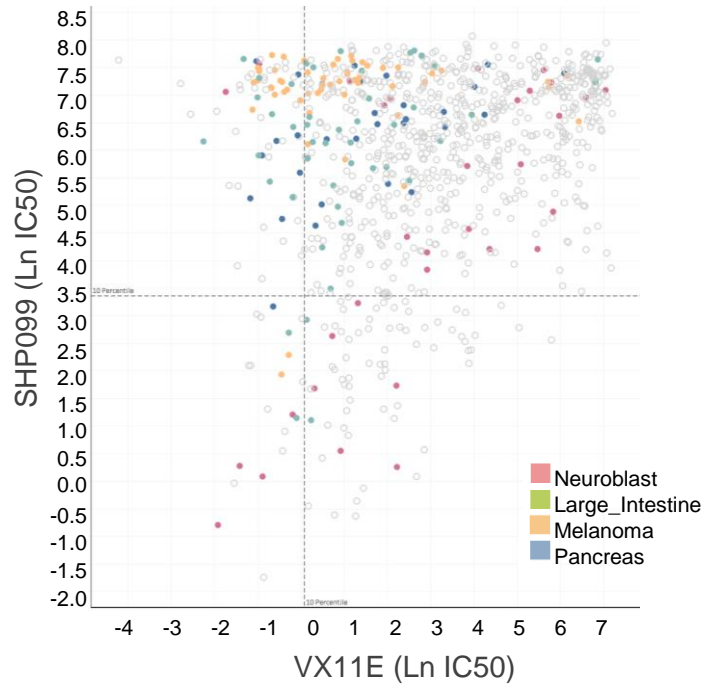

Sup Fig.1. Graphs represent differential activity of SHP099 (IC50) with respect to IC50 of trametinib (A) and VX11E (B) for each cell line (n=922; 32 NB cell lines). Dotted lines correspond to top 10% sensitive cell line for each drug. Related to Figure 1.

A

Sup. Fig. 2

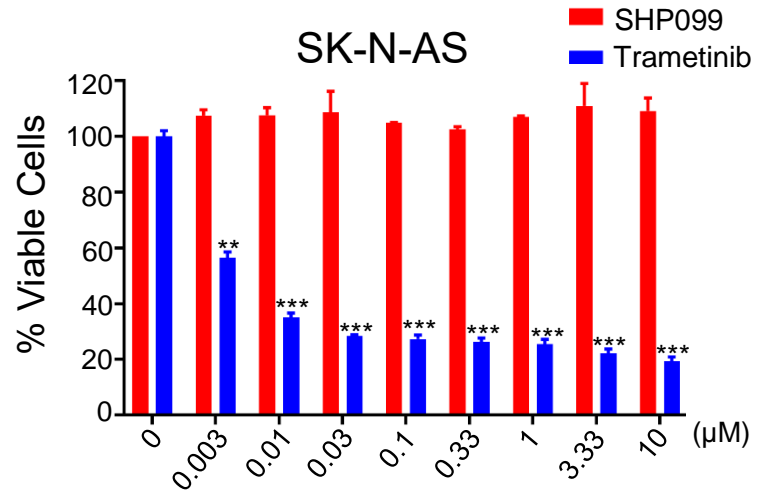

B

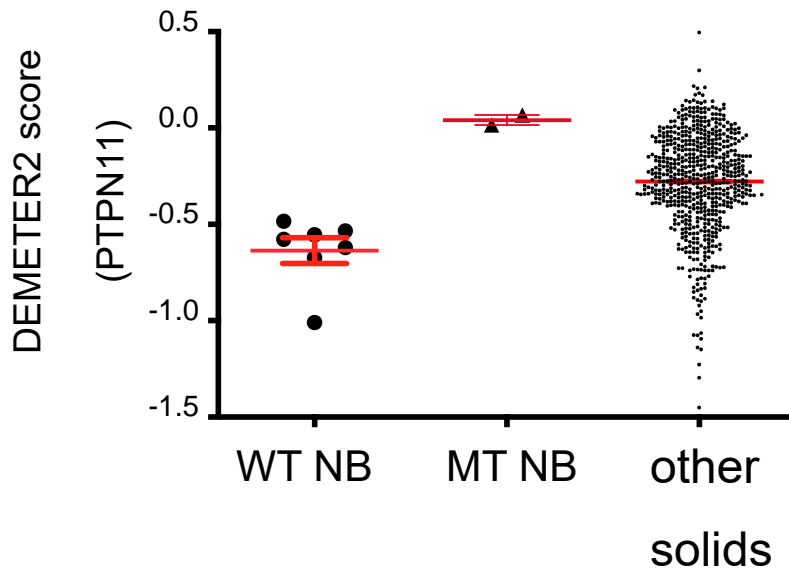

Sup Fig.2. Trametinib sensitivity in an *NRAS* MT NB cell line. A) Graph represents percent viable cells assessed by Cell Titer-Glo in the *NRAS* MT SK-N-AS cell line following 7 days treatment with increasing concentrations (0.003-10  $\mu$ M) of trametinib or SHP099. Error bars are  $\pm$ SEM. Three individual sets of experiments were performed. B) PTPN11 (SHP2) RNAi screens (Achilles+DRIVE+Marcotte) DEMETER2 scores from DepMap. NB RAS/RAF WT n=7, NB RAS/RAF MT n=2, other tumors, n= 639. WT NB versus other tumors,  $p < 0.0001$  by Mann-Whitney. Related to Figure 1.

Sup. Fig. 3

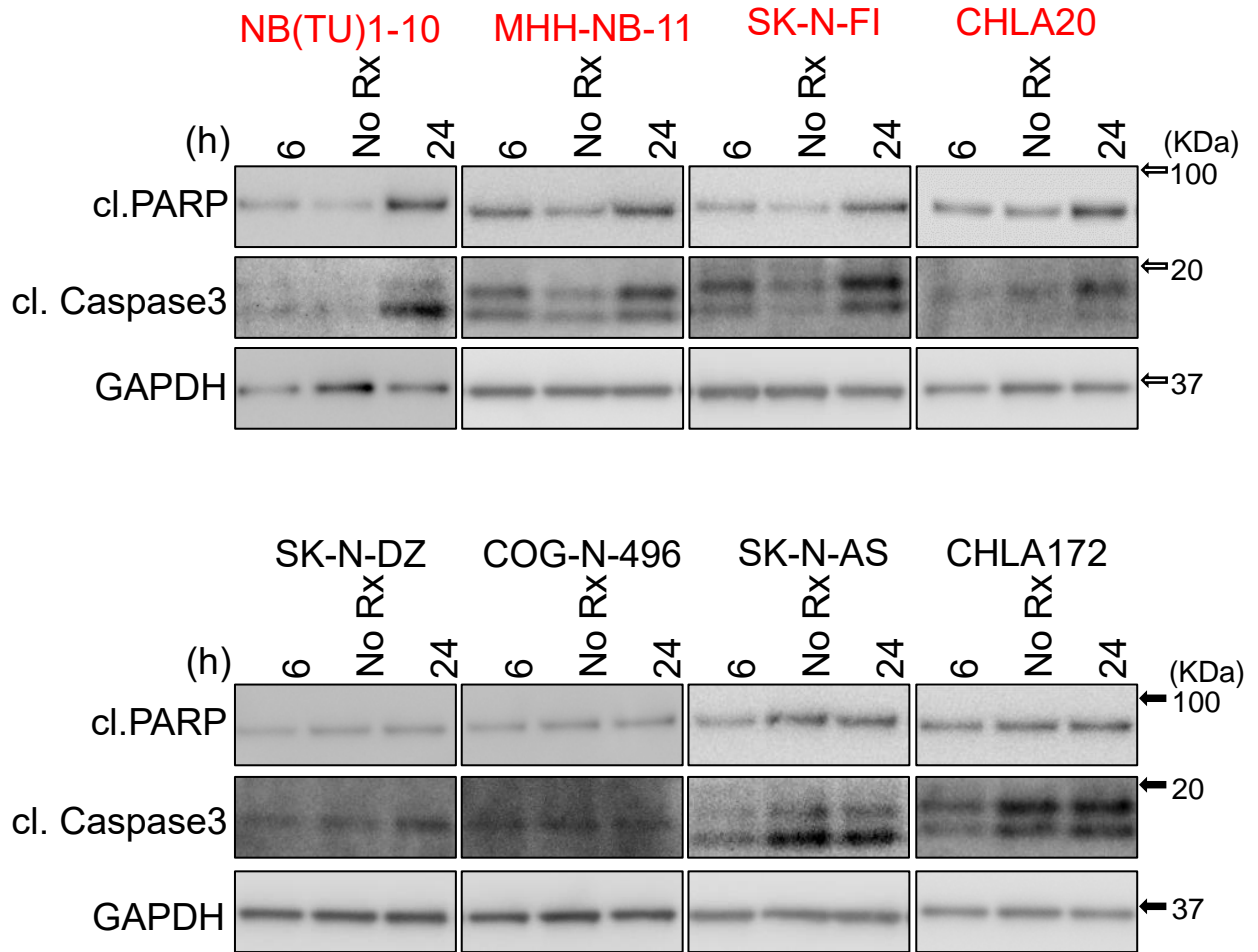

Sup Fig.3. Viability effects were in part due to cell death. Immunoblot of the NB cell lines indicated, treated with SHP099 (5  $\mu$ M) for 6h and 24h, respectively, or untreated (No Rx), and assessed with the indicated antibodies. Related to Figure 1.

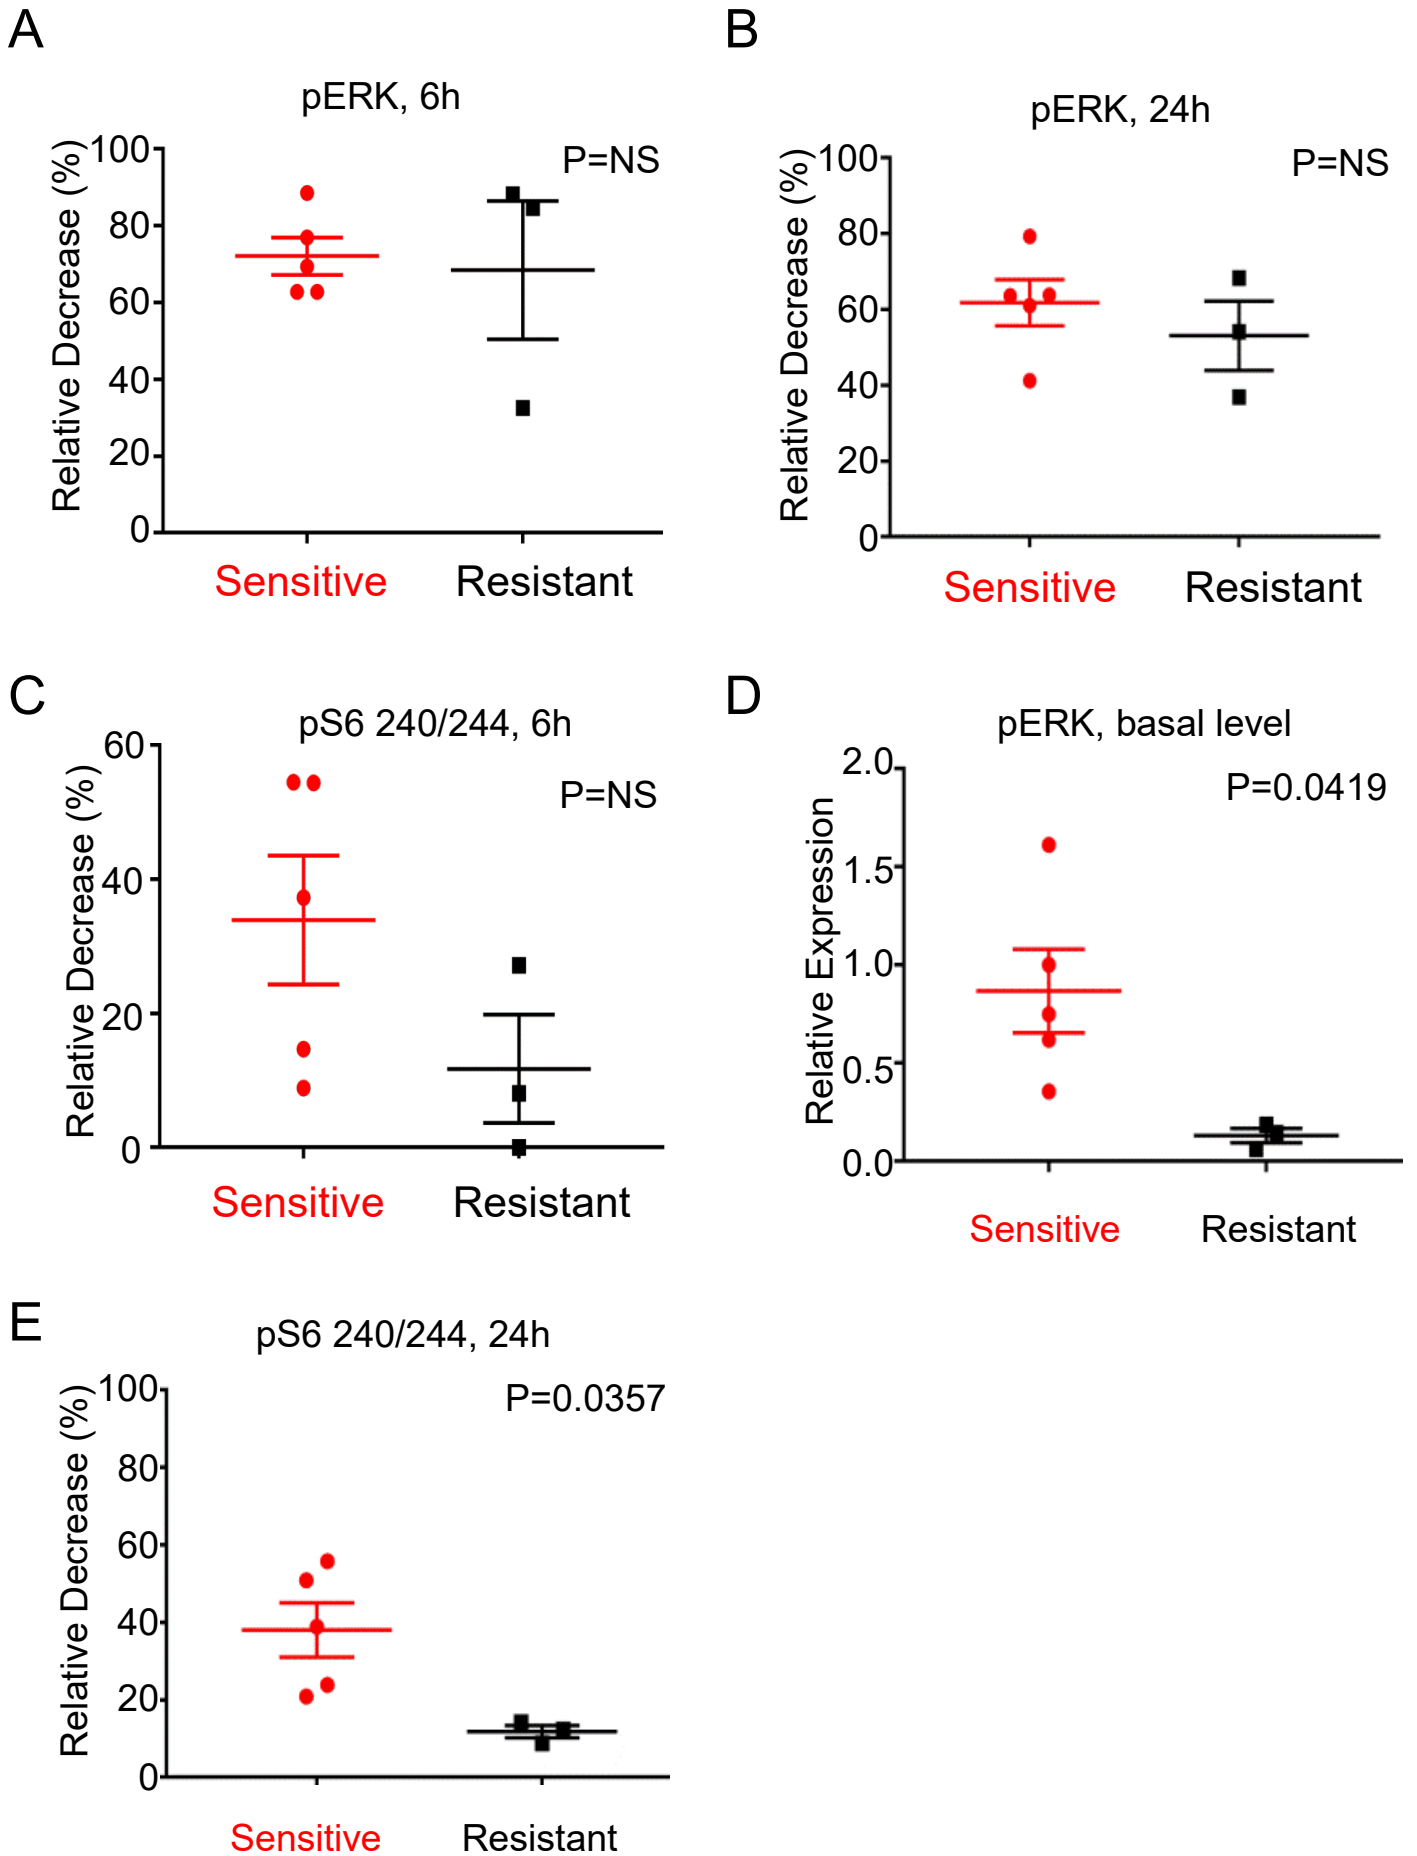



Sup Fig.4. Relative levels of pERK and pS6 in SHP099 sensitive and insensitive NB cell lines. (A) Relative levels of pERK in SHP099 sensitive and insensitive lines normalized to GAPDH. (B) Relative percent decrease of pERK expression in SHP099 sensitive and resistant NB cell lines treated with SHP099 for 24h. (C) Relative percent decrease of pS6 in SHP099 sensitive and resistant NB cell lines treated with SHP099 for 6h. (D) Relative expression of pERK basal level in SHP099 sensitive (red) and resistant (black) NB cell lines compared to untreated (No Rx) cells. (E) Relative percentage decrease of pS6 (240/244) in SHP099 sensitive (red) and resistant (black) NB cell lines compared to untreated (No Rx), quantified from figure 2A. Related to Figure 2.

A

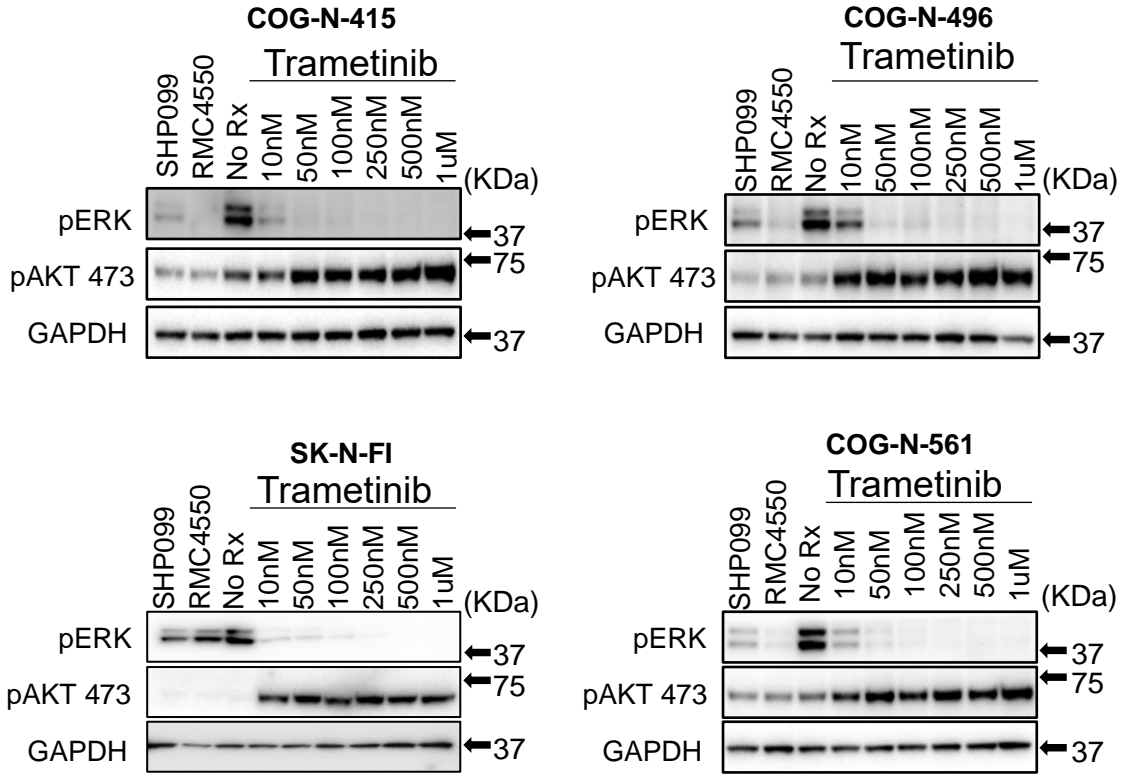

B

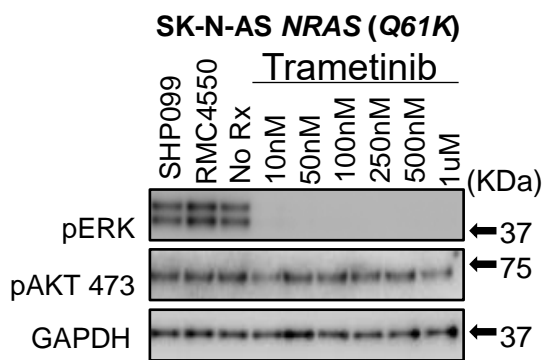

Sup Fig.5. Immunoblot analysis of NRAS WT and MT NB cell lines treated with SHP099 (5  $\mu$ M) or RMC-4550 (10  $\mu$ M) or trametinib. A) Immunoblot analysis of NB PDX lines COG-N-415, COG-N-496, COG-N-561 and SK-N-FI treated with SHP099 (5  $\mu$ M) or RMC-4550 (10  $\mu$ M) or trametinib (0.01  $\mu$ M-1  $\mu$ M) for 24h and untreated control (No Rx) cells assessed with the indicated antibodies. GAPDH was used as loading control. B) Immunoblot analysis of NRAS mutant SK-N-AS cells treated with SHP099 (5  $\mu$ M) or RMC-4550 (10  $\mu$ M) or trametinib (0.01  $\mu$ M-1  $\mu$ M) for 24h and untreated control (No Rx) cells were assessed with the indicated antibodies. GAPDH was used as loading control. Related to Figure 2.

A

Sup Fig. 6

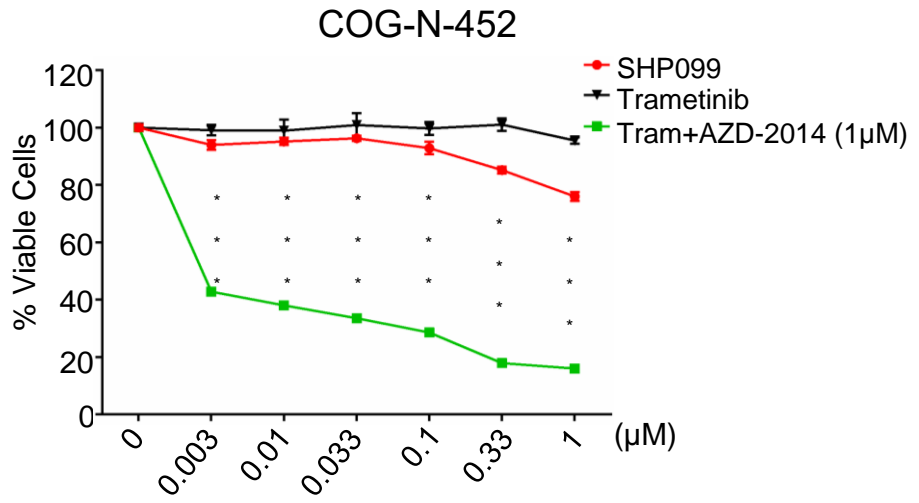

B

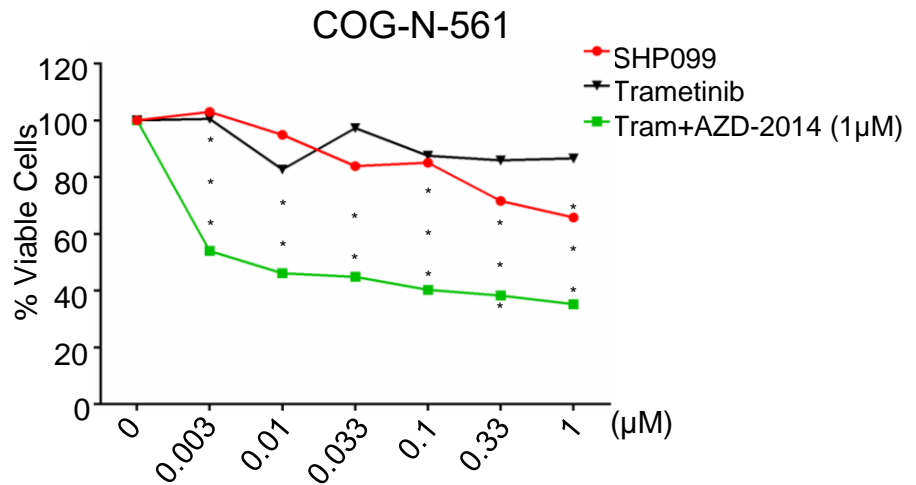

C

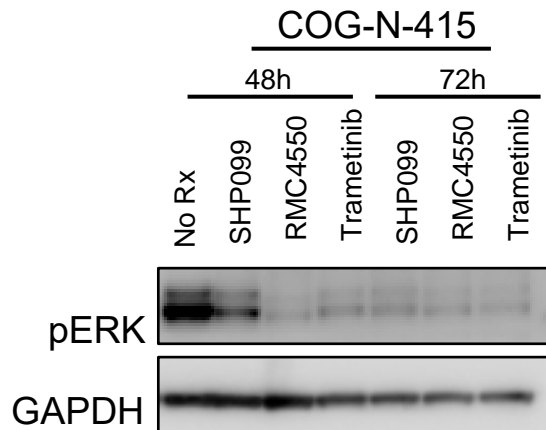

Sup Fig.6. mTOR inhibitor AZD-2014 sensitizes NB lines to trametinib. Percent viable cells assessed by Cell Titer-Glo in the (A) COG-N-452 and (B) COG-N-561 cell lines following 72h treatment with increasing concentrations (0.003-10  $\mu$ M) of SHP099, trametinib, AZD-2014 and trametinib in combination with 1  $\mu$ M AZD-2014. Error bars are  $\pm$ SEM. Three individual sets of experiments were performed. (C) Immunoblot analysis of pERK in the COG-N-415 cell line treated with SHP099 (5  $\mu$ M), RMC-4550 (10  $\mu$ M) or trametinib (1  $\mu$ M) for 48h and 72h. Related to Figure 2.

A

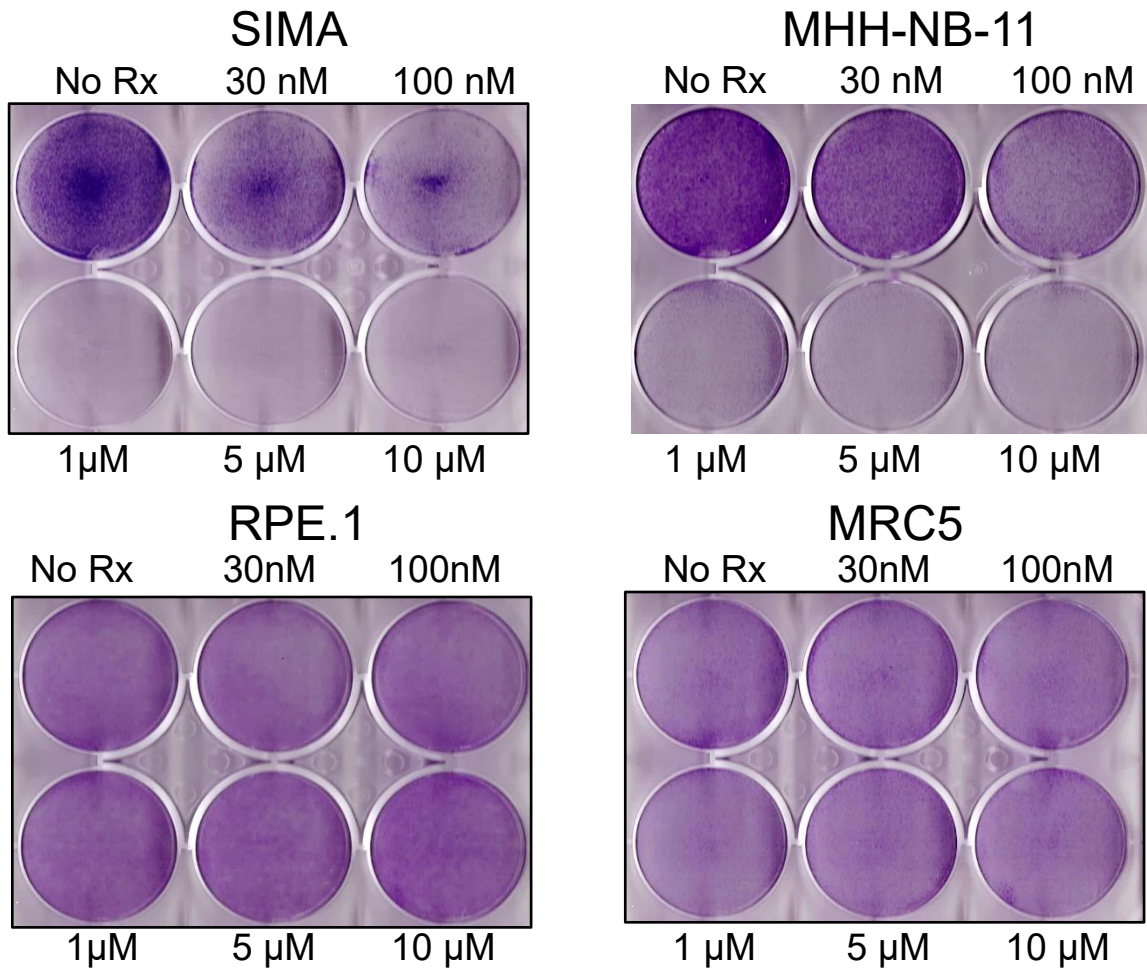

B

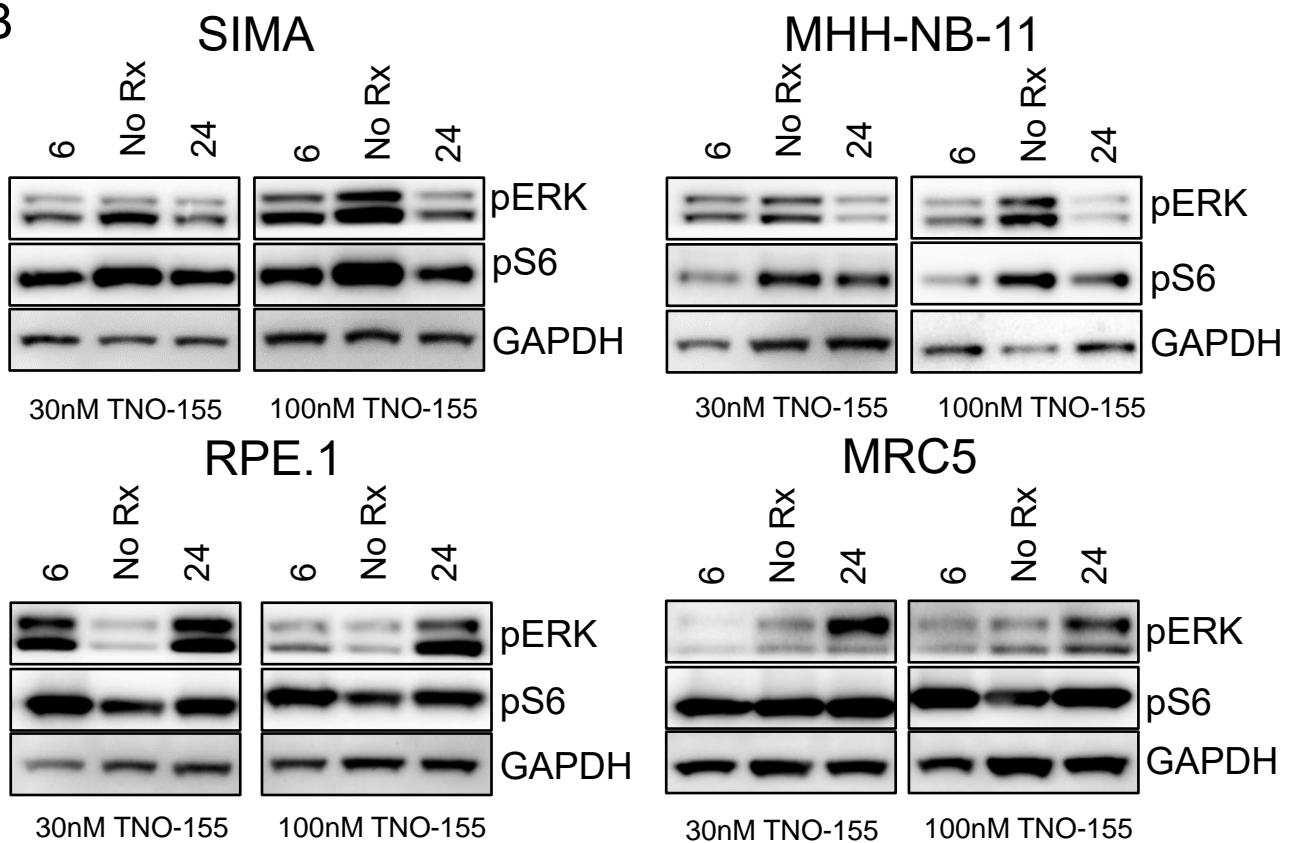

Sup Fig.7. TNO-155 show similar sensitivity to SHP099 sensitive in both NB cell lines and normal tissue-derived cell lines. (A) Crystal violet assays or (B) immunoblot analysis of SIMA and MHH-NB-11 NB cell lines and RPE.1 and MRC5 normal tissue-derived cell lines treated with vehicle (No Rx), and for (A), increasing TNO-155 from 30 nM to 10  $\mu$ M until the untreated (No Rx) cells reached confluency. Experiments were performed in triplicates. (B) Immunoblot analysis of NB cell lines SIMA, MHH-NB-11 and the normal tissue-derived cell lines RPE.1 and MRC5 treated with TNO-155 (30 nM or 100 nM) for 6h or 24h and untreated control (No Rx) cells assessed with the indicated antibodies. GAPDH was used as loading control. For (A), experiments were performed in triplicates. Related to Figure 2.

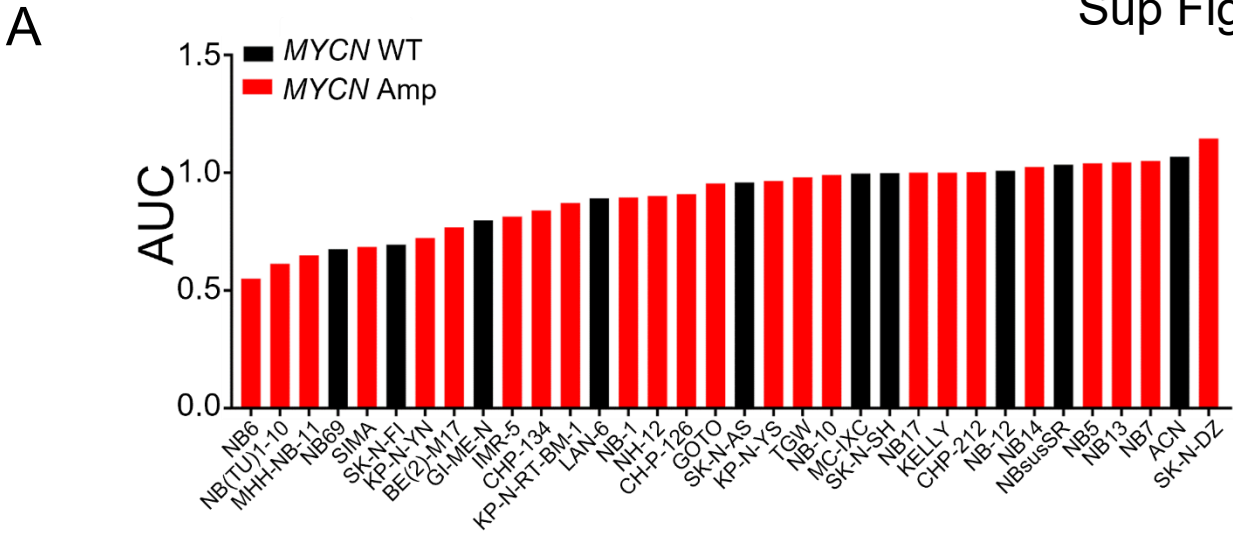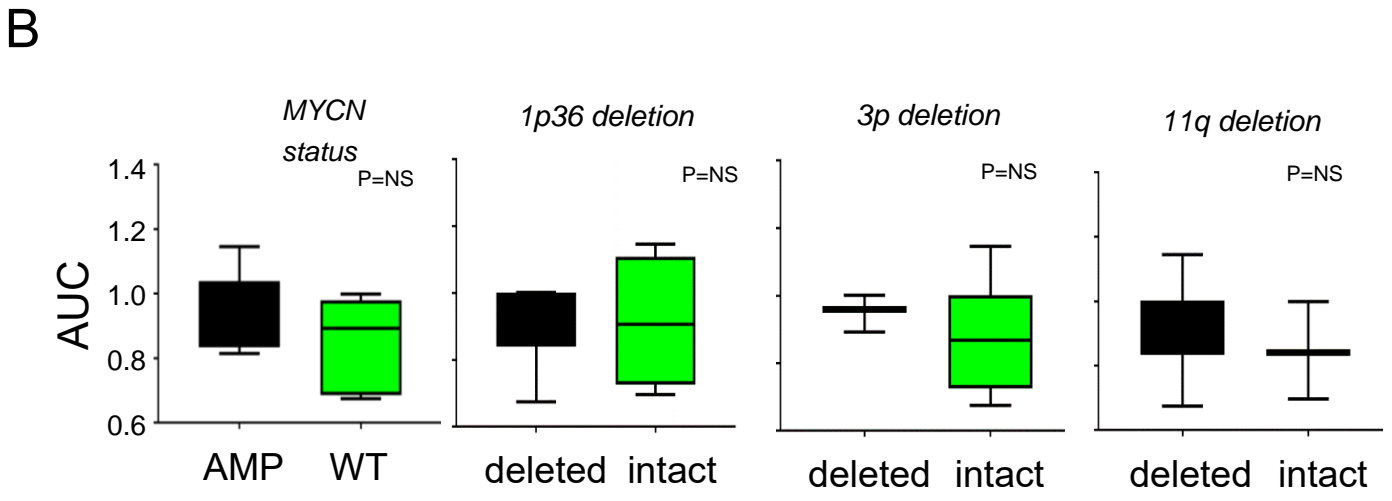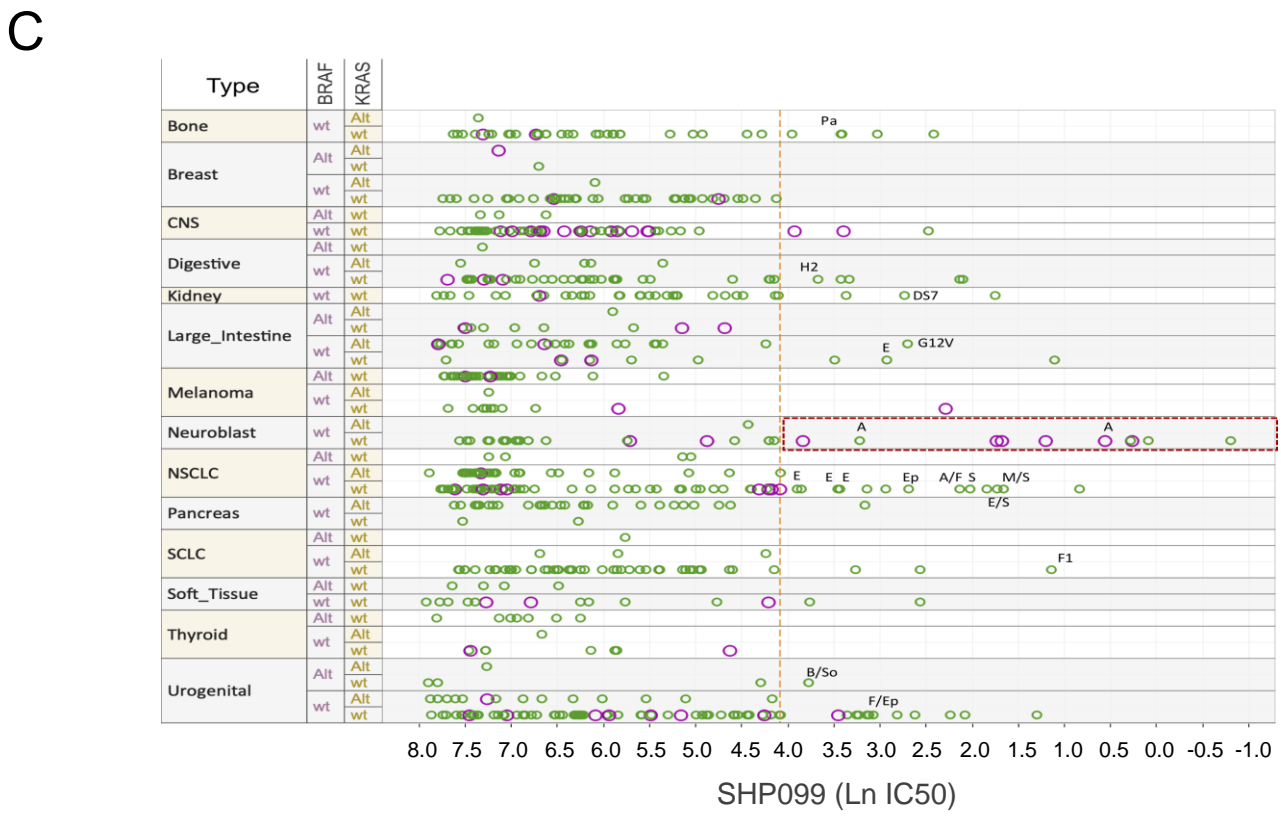



Sup Fig 8. SHP099 sensitivity does not correlate with typical genomic alterations in NB. A) Area under curve (AUC) of SHP099 in NB cell lines assayed in HTS. Amplification status of MYCN are indicated as MYCN amplified (red bars) and MYCN-WT (black bars). B) AUC of SHP099 compared to MYCN status (WT and amplified) and various deletions in NB cell lines. Mann-Whitney test was performed to calculate statistical significance between the groups (NS- nonsignificant). C) SHP099 sensitivity correlates with NF1 mutational status in NB. Activity of SHP099 across different tissue types including 32 NB cell lines. The orange dotted line corresponds to the top 10% sensitive cell lines. Mutational status of selected lines are shown: Pa- PDGFRA; H2- HER2 amplified; DS7- DUSP7; E- EGFR; G12V- KRASG12V; A- ALK; Ep- EPHA2; F- FGFR2; S- STK11; M- MET; F1- FGFR1; B- BRAF; So- SOS1. Related to Figure 4.

# Sup Fig.9

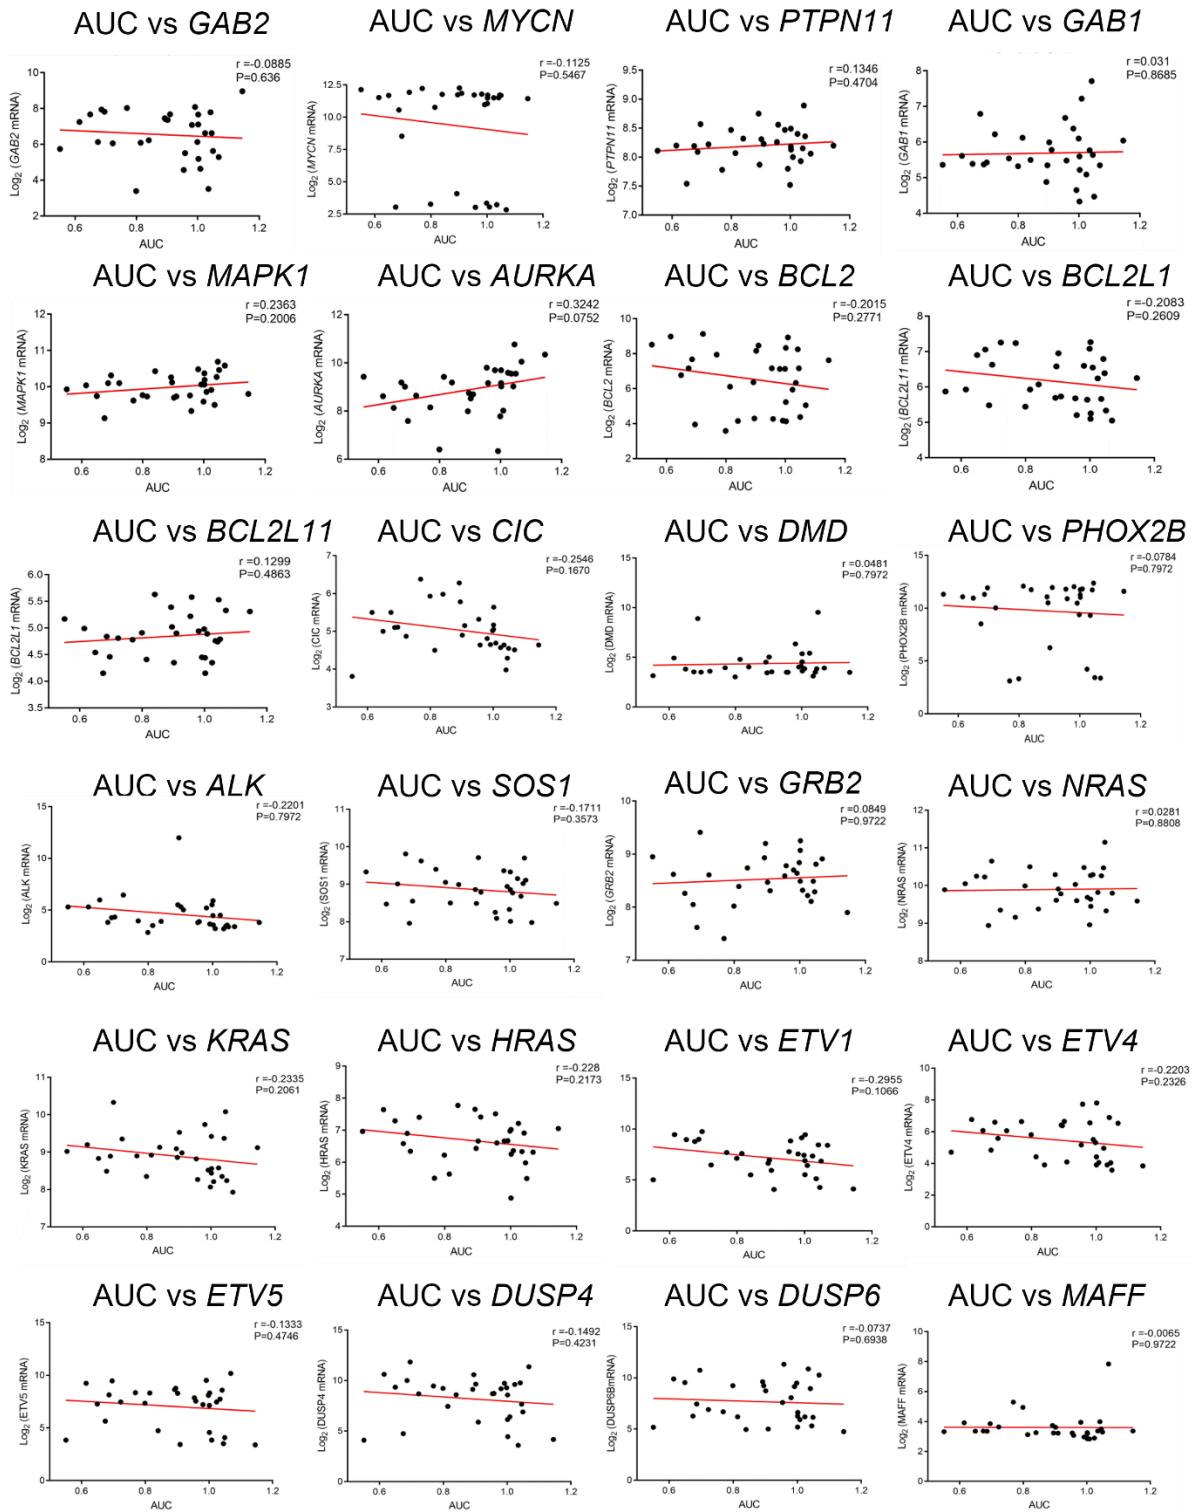

Sup Fig.9. SHP099 sensitivity is not correlated with MEK/ERK expression in NB cell lines. AUC of SHP099 compared to RNA levels of various genes associated with the MEK/ERK pathway. Data obtained from R2 Genomic (Sanger) Database (<http://hgserver1.amc.nl>). Related to Figure 4.

A

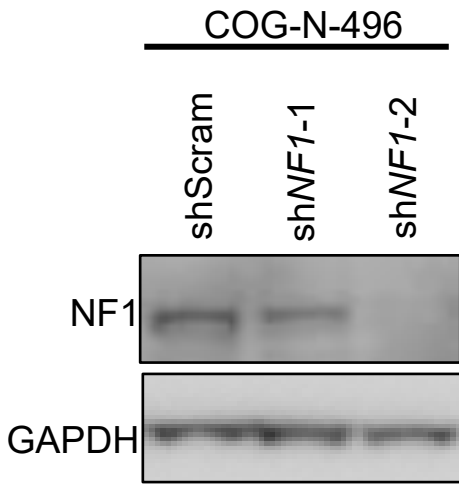

B

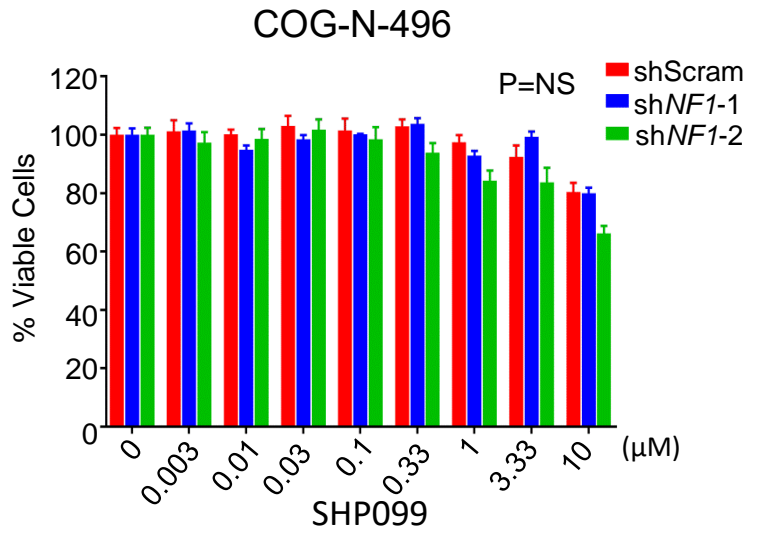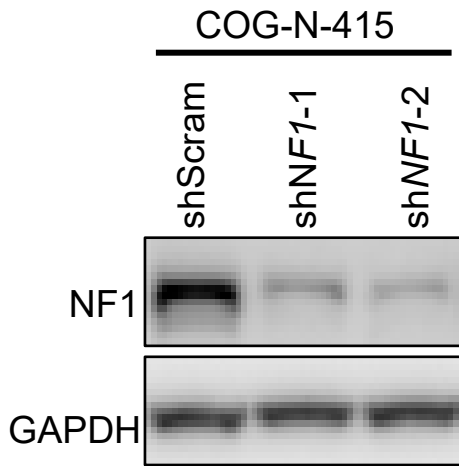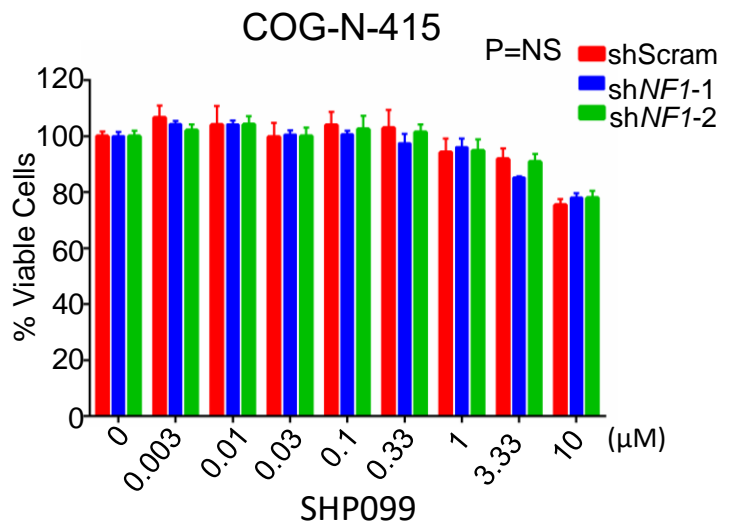

C

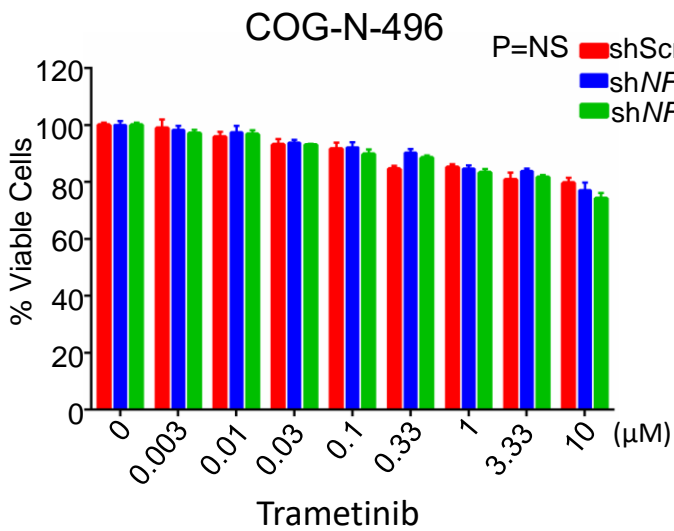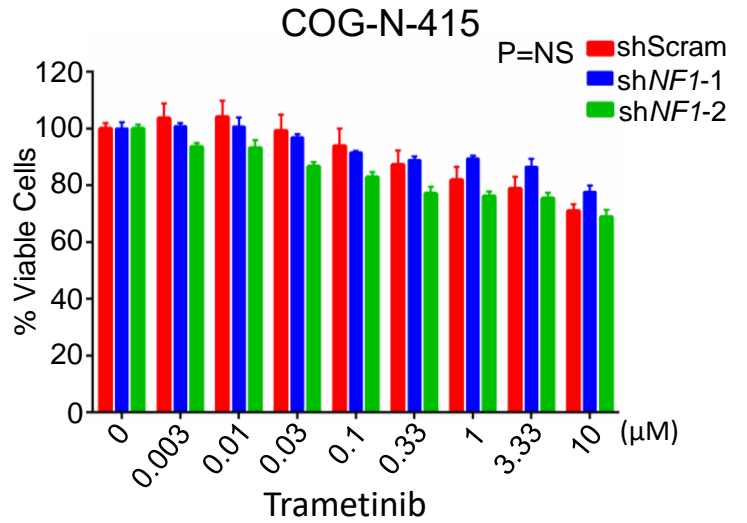

Sup Fig.10. NF1 knockdown is not sufficient to confer SHP099 sensitivity in SHP099-insensitive NB cell lines. A) Immunoblot analysis of NF1 knockdown using NF1 shRNA in SHP099 insensitive lines: COG-N-496 and COG-N-415. Scrambled shRNA was used for an experimental control and GAPDH as the loading control. (B and C) Percent viable cells assessed by Cell Titer-Glo in NF1 shRNA knockdown and scrambled shRNA (control) COG-N-496 and COG-N-415 cells treated with increasing concentrations (0.003-10  $\mu$ M) of SHP099 (B) and Trametinib (C) for 72 h. Error bars are  $\pm$ SEM. Three individual sets of experiments were performed. Related to Figure 4.

Sup Fig.11

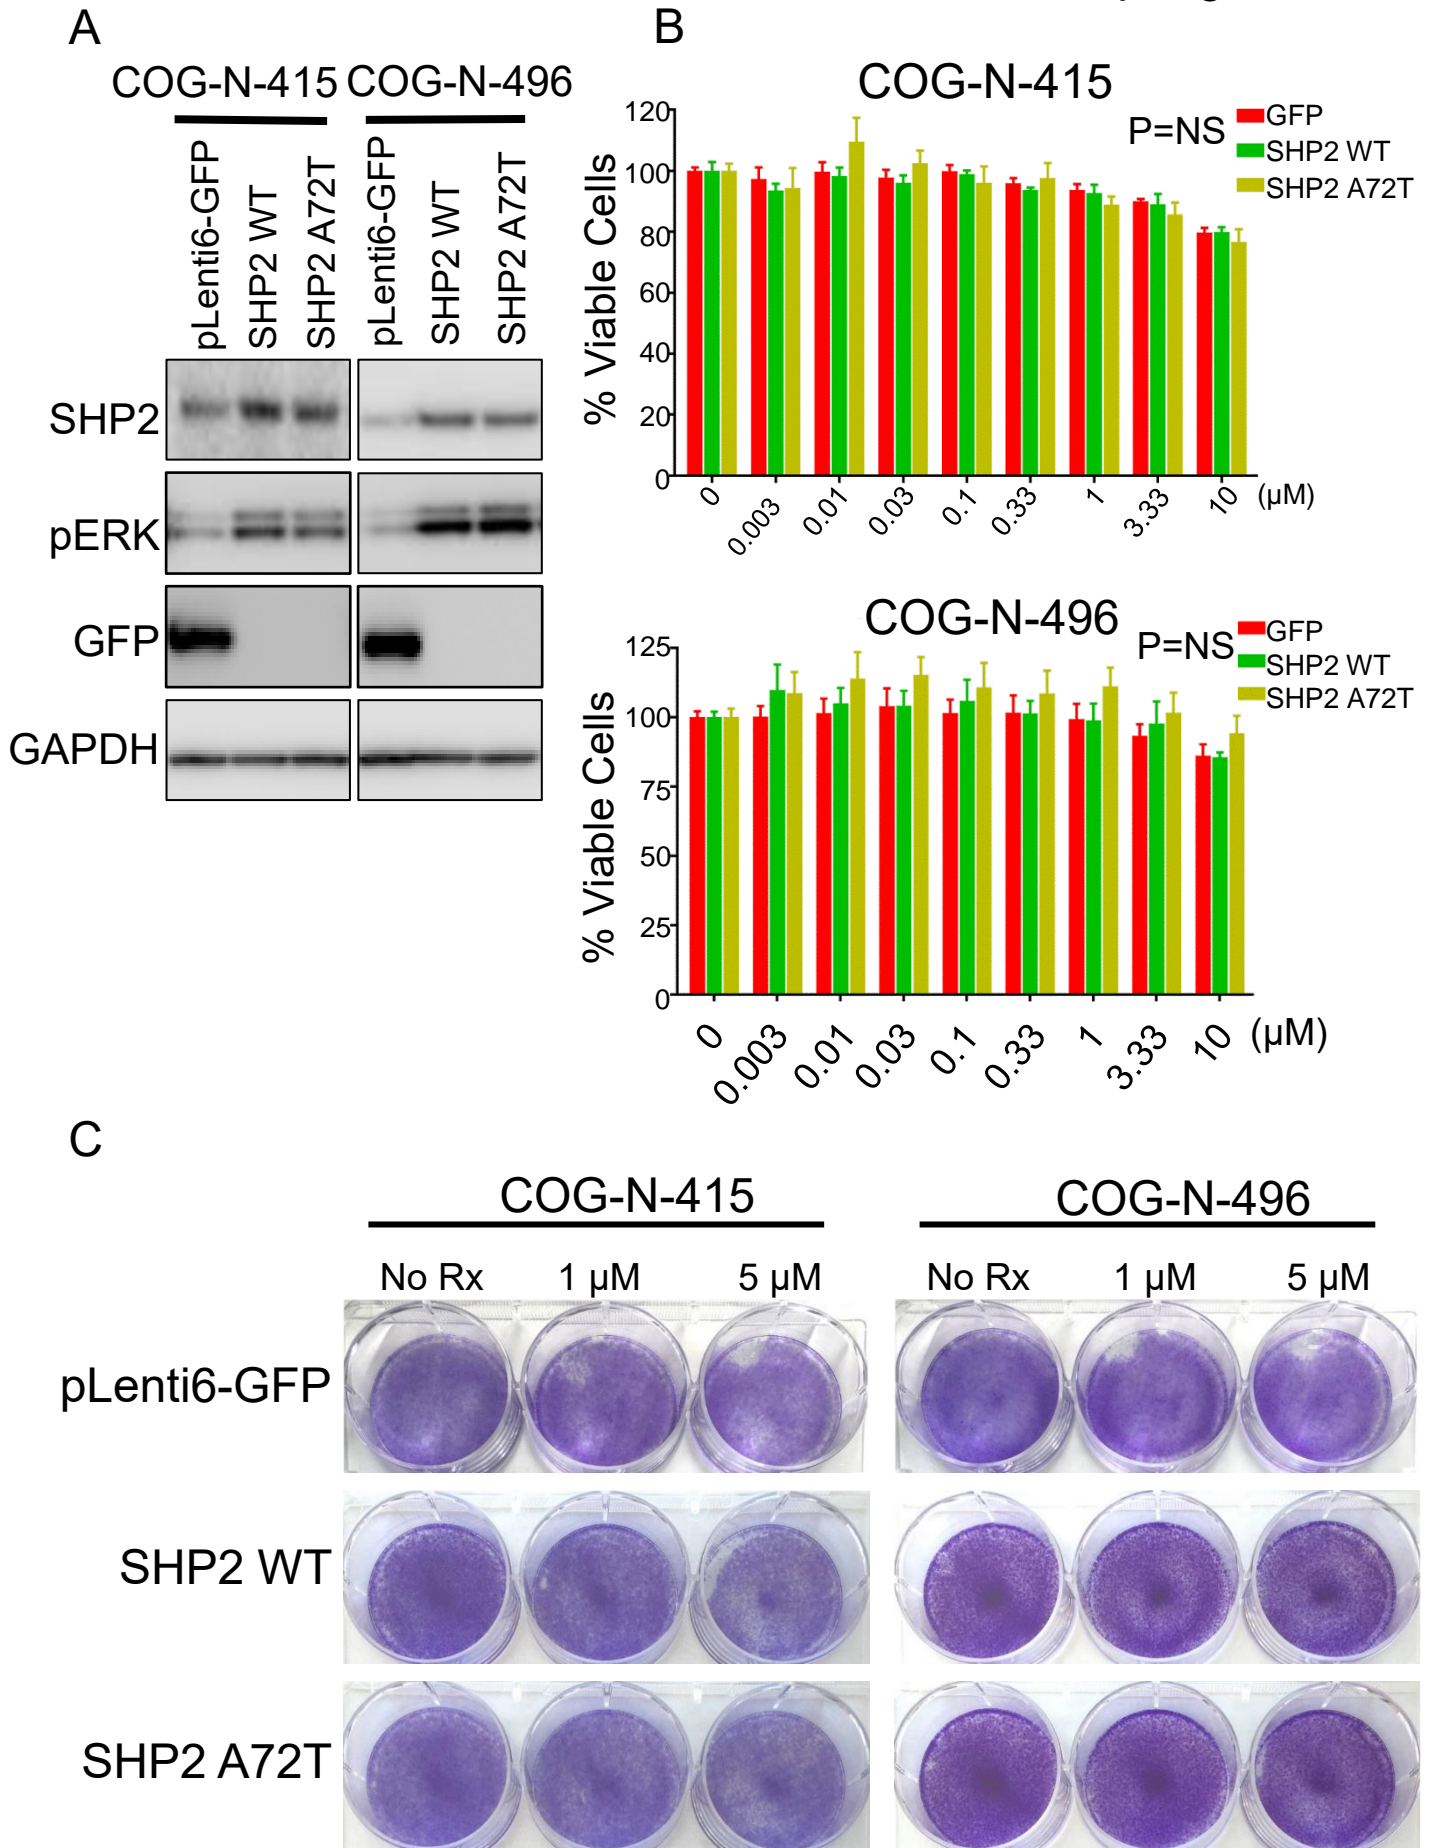

Sup Fig 11. SHP2 mutation (A72T) in NB does not affect SHP099 sensitivity. A) Immunoblot of pLentiGFP, SHP2 WT or SHP2 A72T mutant expressing CO-N-415 and COG-N-496 NB cell lines assessed for SHP2, pERK and GFP expression. GAPDH was used as loading control. B) Graph represents percent viable cells assessed by Cell Titer-Glo in the pLentiGFP, SHP2 WT or SHP2 A72T mutant expressing COG-N-415 and COG-N-496 NB cell lines following 72h treatment with increasing concentrations (0.003-10  $\mu$ M) of SHP099. Error bars are  $\pm$ SEM. Three individual sets of experiments were performed. C) Crystal violet assay of pLentiGFP, SHP2 WT or SHP2 A72T mutant expressing COG-N-415 and COG-N-496 NB lines treated with vehicle (No Rx) and SHP099 at 1  $\mu$ M and 5  $\mu$ M until the untreated cells (No Rx) reached confluency. Experiments were performed in triplicates. Related to Figure 4.

# Sup Fig. 12

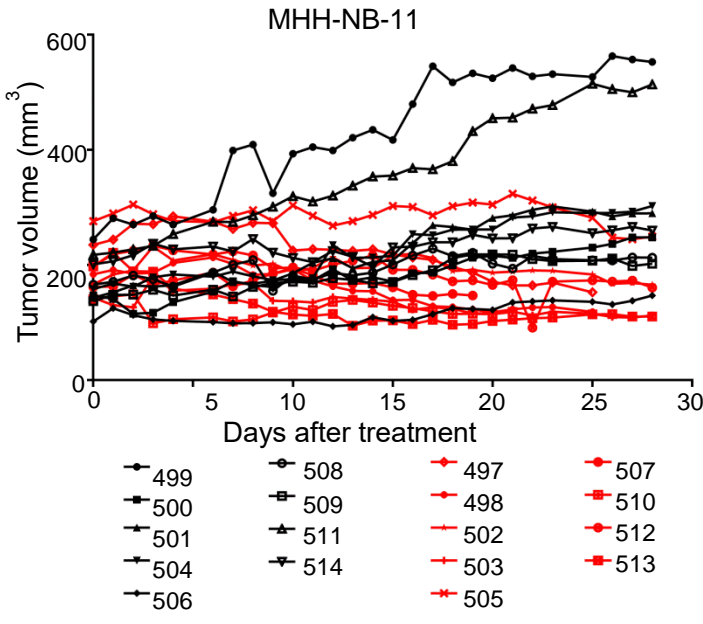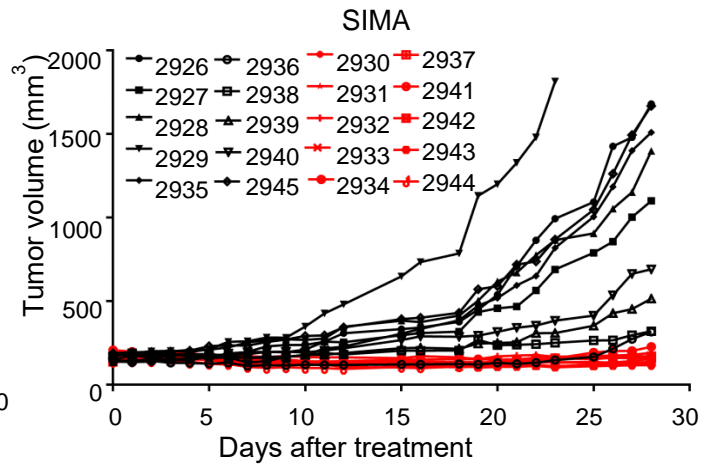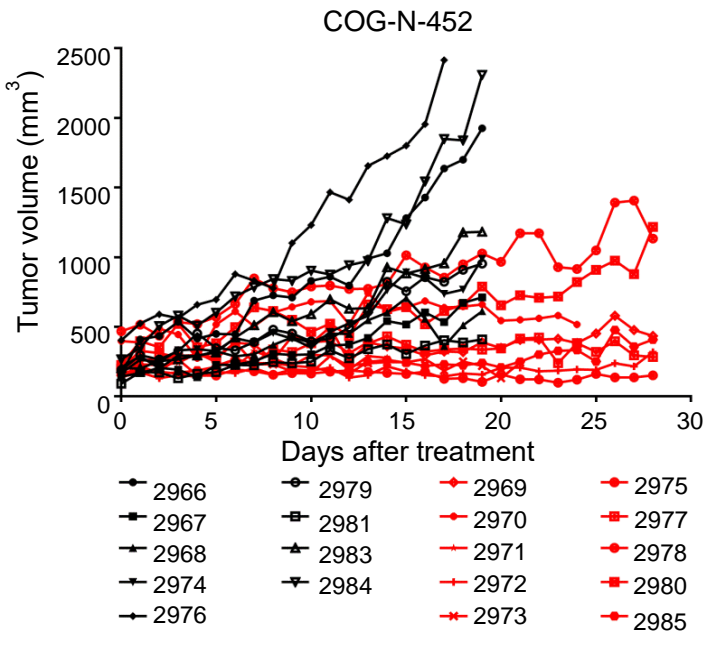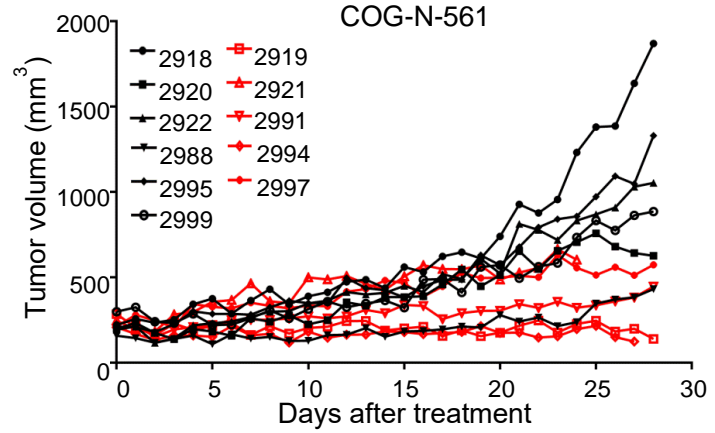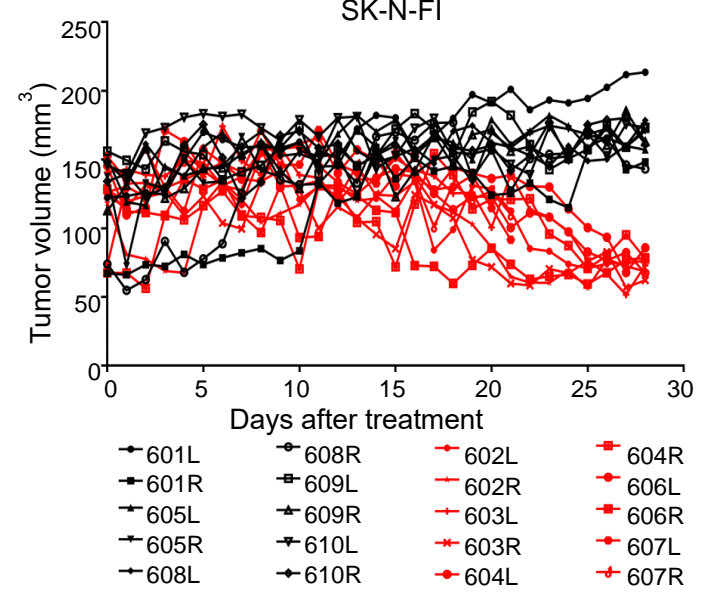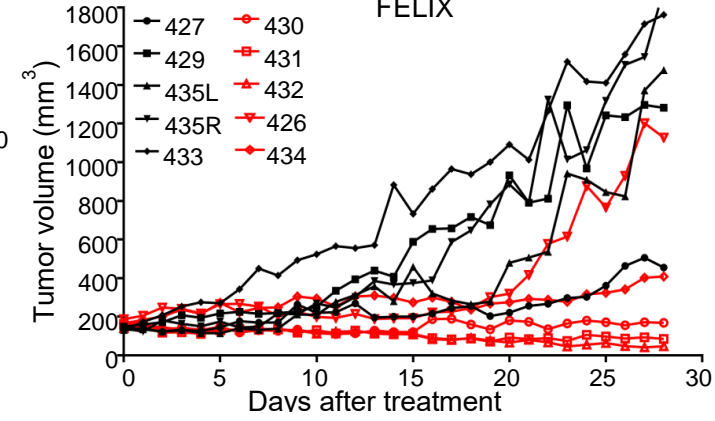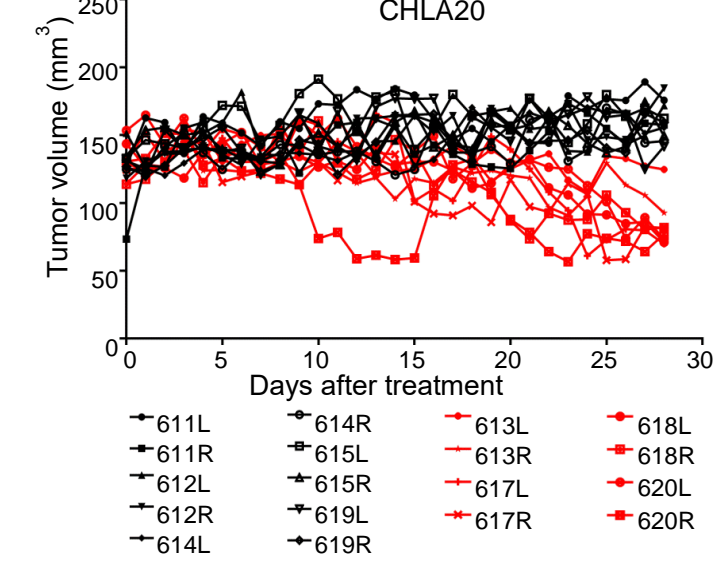



Sup Fig.12. Tumor measurements of cell line xenograft and patient derived xenograft models of NB treated with SHP099. Graph represents tumor volume of 7 individual cell line xenograft and patient derived xenograft models measured during SHP099 (75 mg/kg) treatment for 28 days. Related to Figure 6.

# Sup Fig. 13

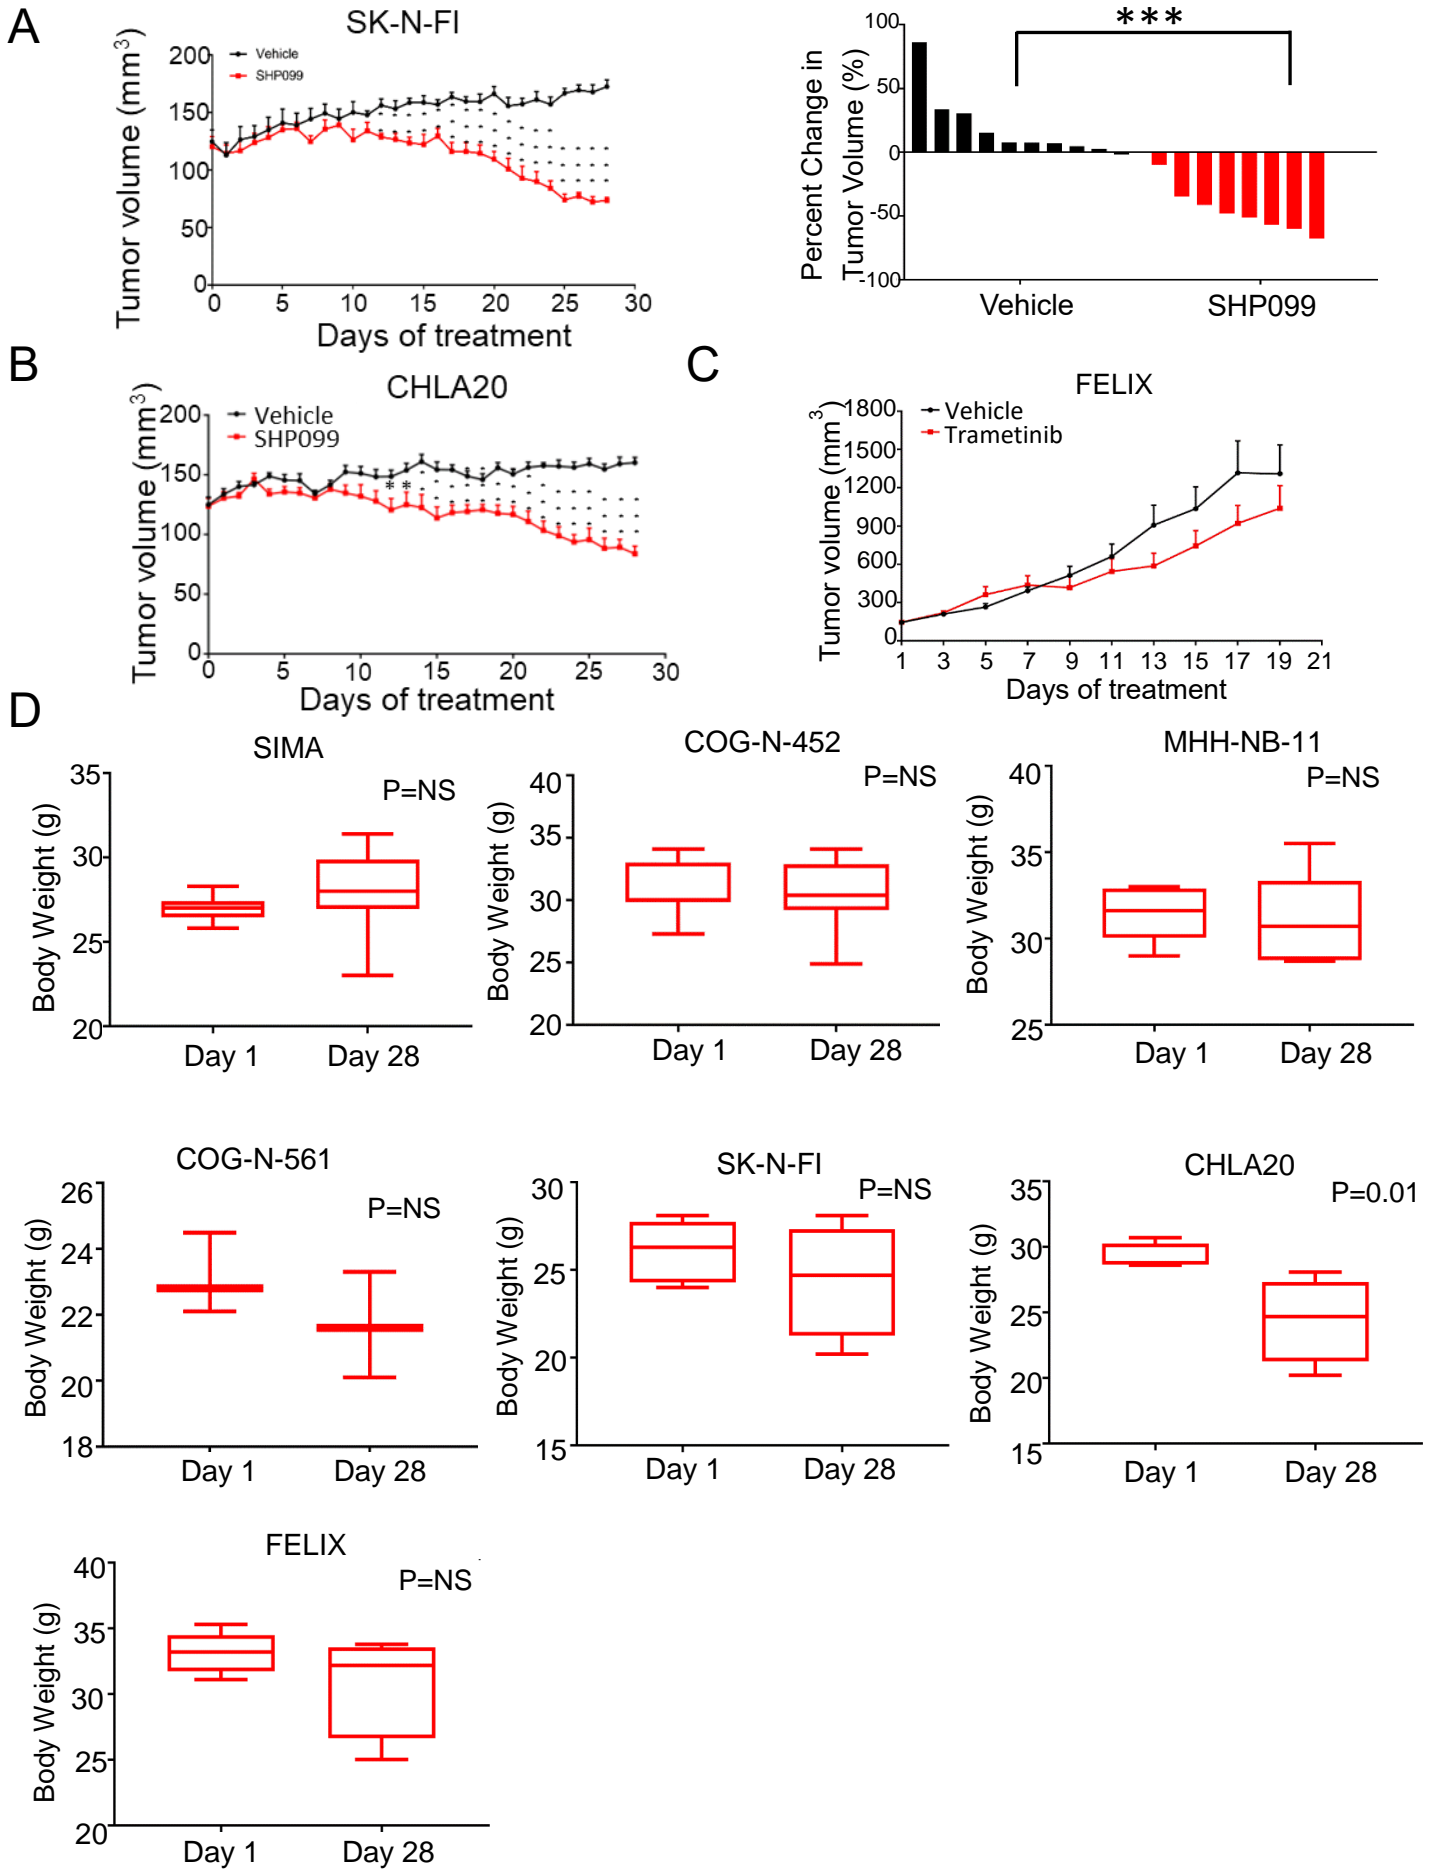

Sup Fig.13. SHP099 is effective *in vivo* and trametinib is ineffective *in vivo*. (A and B) Anti-tumor activity of SHP099 was assessed in mice bearing the indicated tumors. Mice were dosed with SHP099 (75 mg/kg) daily or vehicle (control) for 28 days. Waterfall plot represents change in tumor volume percent of each tumor to their initial tumor size (right panel) in the control and treated group. Error bars are  $\pm$ SEM. Student t-test was used to calculate significance (\* $p < 0.05$ , \*\* $p < 0.01$ , \*\*\* $p < 0.001$ ). C) FELIX PDX model treated with 1 mg/kg/qd trametinib. D) SHP099 treatment does not induce toxicity in mice. Body weight of SHP099 (75 mg/kg) treated *MYCN*-amplified or wild type xenograft and PDX mouse models of NB measured at day1 and day28 of treatment, NS= Non-significant by student's t test. Related to Figure 6.
