# Supplementary material for: High-risk neuroblastoma with NF1 loss of function is targetable using SHP2 inhibition
Source: PubMed Central journal article supplement (PMC10353975; doi:10.1016/j.celrep.2022.111095), 2022-07-26
Supplement: NIHMS1914136-supplement-5.pdf [file NIHMS1914136-supplement-5.pdf]

## Cell Line Short Tandem Repeat (STR) Profile Report

**Principal Investigator:**

**Institution:**

**Cell Line ID:** SKNFI

**Report Date:** February 25, 2022

**Submitting Researcher:**

**Sample Type Submitted:** Cultured cells

**Tracking ID:** CLA-Mycoplasma Testing-Request\_External -

**Profile Kit Requested:** GenePrint 10 (Promega)

\_2022.02.18

### STR Profile:

| Loci    | SKNFI |
|---------|-------|
| AMEL    | X,Y   |
| CSF1PO  | 10,12 |
| D13S317 | 11,14 |
| D16S539 | 11,12 |
| D21S11  | 28,30 |
| D5S818  | 12,13 |
| D7S820  | 8,9   |
| TH01    | 6,9.3 |
| TPOX    | 8,9   |
| vWA     | 16,17 |

» Loci with one allele listed are homozygous for that STR marker.

### STR Graphic Profile:

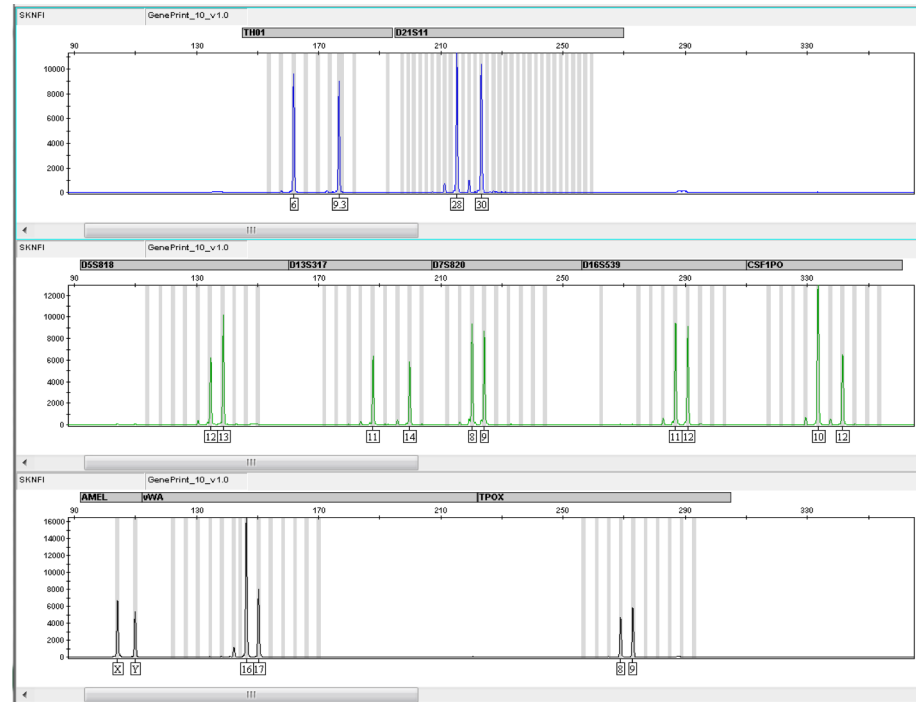

*Peaks that appear to be legitimate stutter or are spectral bleed-through artifacts are not labeled.*

- + This report provides a STR profile for the cell line submitted, it does not automatically authenticate the cell line. Authentication is determined by comparison to the STR profile of the original donor tissue or cell stock. This STR profile can be used to verify the cell line is human, evaluate profile consistency between provisionally related cell isolates, detect cross-contamination with another human cell line (intra-species contamination), and to compare to profile databases, which we strongly recommend. This STR report does not rule out cross-contamination with an inter-species cell line (non-human).
- + Please see the Pdf file *Additional Information* sent with the results for more information about interpreting your STR profile and links to profile databases.

**Principal Investigator:**  
**Institution:**  
**Cell Line ID:** SKNFI  
**Report Date:** February 25, 2022

**Procedure:**

A Promega GenePrint 10 Kit is used to PCR amplify eight short tandem repeat (STR) loci plus a gender determining marker, Amelogenin. The PCR product is electrophoresed on an ABI Prism® 3730xl Genetic Analyzer using an ILS600 internal lane standard (Promega). Data is analyzed using GeneMapper® v 4.0 software (Applied Biosystems). An allelic ladder that contains fragments of the same lengths as many of the known alleles for the loci is used to determine the amplified sample fragments alleles. Appropriate positive and negative controls are used.

**Raw Data Table:** (STR markers with one allele listed are homozygous for that marker.)

| Sample Name | Marker  | Allele 1 | Allele 2 | Size 1 | Size 2 | Height 1 | Height 2 | Peak Area 1 | Peak Area 2 |
|-------------|---------|----------|----------|--------|--------|----------|----------|-------------|-------------|
| SKNFI       | AMEL    | X        | Y        | 104.07 | 109.91 | 00:00.0  | 5360     | 40885       | 31766       |
| SKNFI       | CSF1PO  | 10       | 12       | 333.48 | 341.53 | 12944    | 6500     | 91378       | 46584       |
| SKNFI       | D13S317 | 11       | 14       | 187.77 | 199.74 | 6399     | 5825     | 39075       | 35907       |
| SKNFI       | D16S539 | 11       | 12       | 286.78 | 290.86 | 9432     | 9111     | 64526       | 61935       |
| SKNFI       | D21S11  | 28       | 30       | 215.17 | 223.21 | 11318    | 10398    | 70258       | 66048       |
| SKNFI       | D5S818  | 12       | 13       | 134.64 | 138.75 | 6209     | 10188    | 38279       | 61604       |
| SKNFI       | D7S820  | 8        | 9        | 220.21 | 224.23 | 9343     | 8684     | 59025       | 55886       |
| SKNFI       | TH01    | 6        | 9.3      | 161.83 | 176.65 | 9624     | 9063     | 57747       | 54285       |
| SKNFI       | TPOX    | 8        | 9        | 268.82 | 272.8  | 4669     | 5807     | 30814       | 38708       |
| SKNFI       | vWA     | 16       | 17       | 146.29 | 150.32 | 16485    | 8029     | 101342      | 50397       |

Cellosaurus

CLASTR 1.4.4  
The Cellosaurus STR Similarity Search Tool

| Markers                                                                                                                                                                                                                                                                                                                                                                                                                                                                                                                                                                                                                                                                                                                                                                                                                                                                                                                                                                                                                                                                                                                                                                                                                                                                                                                                                                                                                                                                                                                                                                                                                                                                                                                                                                                                                                                                                                                                                                                                                                                                                                                                                                                                   | Human | Mouse | Dog | Scoring                                                                                                                                                                                                                                                                                                                                                                                                                                                                                                                                                                                                                                                                                                                                                                                                                                                                                                                                                                                                                             |
|-----------------------------------------------------------------------------------------------------------------------------------------------------------------------------------------------------------------------------------------------------------------------------------------------------------------------------------------------------------------------------------------------------------------------------------------------------------------------------------------------------------------------------------------------------------------------------------------------------------------------------------------------------------------------------------------------------------------------------------------------------------------------------------------------------------------------------------------------------------------------------------------------------------------------------------------------------------------------------------------------------------------------------------------------------------------------------------------------------------------------------------------------------------------------------------------------------------------------------------------------------------------------------------------------------------------------------------------------------------------------------------------------------------------------------------------------------------------------------------------------------------------------------------------------------------------------------------------------------------------------------------------------------------------------------------------------------------------------------------------------------------------------------------------------------------------------------------------------------------------------------------------------------------------------------------------------------------------------------------------------------------------------------------------------------------------------------------------------------------------------------------------------------------------------------------------------------------|-------|-------|-----|-------------------------------------------------------------------------------------------------------------------------------------------------------------------------------------------------------------------------------------------------------------------------------------------------------------------------------------------------------------------------------------------------------------------------------------------------------------------------------------------------------------------------------------------------------------------------------------------------------------------------------------------------------------------------------------------------------------------------------------------------------------------------------------------------------------------------------------------------------------------------------------------------------------------------------------------------------------------------------------------------------------------------------------|
| <p><span style="color: green;">Amelogenin</span> <input type="text" value="X,Y"/> D1S1656 <input type="text"/> <input type="checkbox"/></p> <p><span style="color: blue;">CSF1PO</span> <input type="text" value="10,12"/> D2S441 <input type="text"/> <input type="checkbox"/></p> <p><span style="color: blue;">D2S1338</span> <input type="text"/> D6S1043 <input type="text"/> <input type="checkbox"/></p> <p><span style="color: blue;">D3S1358</span> <input type="text"/> D10S1248 <input type="text"/> <input type="checkbox"/></p> <p><span style="color: blue;">D5S818</span> <input type="text" value="12,13"/> D12S391 <input type="text"/> <input type="checkbox"/></p> <p><span style="color: blue;">D7S820</span> <input type="text" value="8,9"/> D22S1045 <input type="text"/> <input type="checkbox"/></p> <p><span style="color: blue;">D8S1179</span> <input type="text"/> DXS101 <input type="text"/> <input type="checkbox"/></p> <p><span style="color: blue;">D13S317</span> <input type="text" value="11,14"/> DYS391 <input type="text"/> <input type="checkbox"/></p> <p><span style="color: blue;">D16S539</span> <input type="text" value="11,12"/> F13A01 <input type="text"/> <input type="checkbox"/></p> <p><span style="color: blue;">D18S51</span> <input type="text"/> F13B <input type="text"/> <input type="checkbox"/></p> <p><span style="color: blue;">D19S433</span> <input type="text"/> FESFPS <input type="text"/> <input type="checkbox"/></p> <p><span style="color: blue;">D21S11</span> <input type="text" value="28,30"/> LPL <input type="text"/> <input type="checkbox"/></p> <p><span style="color: blue;">FGA</span> <input type="text"/> Penta C <input type="text"/> <input type="checkbox"/></p> <p><span style="color: blue;">Penta D</span> <input type="text"/> SE33 <input type="text"/> <input type="checkbox"/></p> <p><span style="color: blue;">Penta E</span> <input type="text"/></p> <p><span style="color: blue;">TH01</span> <input type="text" value="6,9,3"/></p> <p><span style="color: blue;">TPOX</span> <input type="text" value="8,9"/></p> <p><span style="color: blue;">vWA</span> <input type="text" value="16,17"/></p> |       |       |     | <p><b>Algorithms:</b></p> <p><input type="radio"/> Tanabe</p> <p><input type="radio"/> Masters (vs. query)</p> <p><input type="radio"/> Masters (vs. reference)</p> <p><b>Modes:</b></p> <p><input type="radio"/> Non-empty markers</p> <p><input type="radio"/> Query markers</p> <p><input type="radio"/> Reference markers</p> <p><input type="checkbox"/> Include Amelogenin</p> <hr/> <p><b>Filters</b></p> <p>Score Filter: <input type="text" value="60%"/> ▼</p> <p>Min Markers: <input type="text" value="8"/> ▼</p> <p>Max Results: <input type="text" value="200"/> ▼</p> <hr/> <p><b>Actions</b></p> <p style="text-align: center;"><input type="button" value="Search"/></p> <p style="text-align: center;"><input type="button" value="Load File"/></p> <p style="text-align: center;"><input type="button" value="Example"/></p> <p style="text-align: center;"><input type="button" value="Reset"/></p> <p style="text-align: center;"><input type="button" value="Help"/> <input type="button" value="About"/></p> |

Results of similarity search on the 7919 human cell lines with STR profiles in Cellosaurus release 40.0

| Export table    |              |            |           |            |              |         |         |              |            |         |              |              |        |         |              |    |
|-----------------|--------------|------------|-----------|------------|--------------|---------|---------|--------------|------------|---------|--------------|--------------|--------|---------|--------------|----|
| Accession       | Name         | N° Markers | Score     | Amel       | CSF1PO       | D2S1338 | D3S1358 | D5S818       | D7S820     | D8S1179 | D13S317      | D16S539      | D18S51 | D19S433 | D21S11       | FG |
| <b>NA</b>       | <b>Query</b> | <b>NA</b>  | <b>NA</b> | <b>X,Y</b> | <b>10,12</b> |         |         | <b>12,13</b> | <b>8,9</b> |         | <b>11,14</b> | <b>11,12</b> |        |         | <b>28,30</b> |    |
| CVCL_1702       | SK-N-FI      | 9          | 100.00%   | X,Y        | 10,12        | 17,18   | 16,18   | 12,13        | 8,9        | 11,12   | 11,14        | 11,12        | 12,14  | 12      | 28,30        | 22 |
| CVCL_0093 Best  | RS4;11       | 9          | 76.47%    | X          | 11,12        | 20,25   | 15,17   | 12,13        | 8,12       | 13,14   | 11           | 11,12        | 12,16  | 12,14   | 28,30        | 24 |
| CVCL_0093 Worst | RS4;11       | 9          | 72.73%    | X          | 11,12        | 20,25   | 15,17   | 12           | 8,12       | 13,14   | 11           | 11,12        | 12,16  | 12,14   | 28,30        | 24 |
| CVCL_7811       | UT-SCC-15    | 9          | 76.47%    | X          | 12,15        | 19      | 15      | 12,13        | 8,9        | 13      | 11           | 11,12        | 12,14  | 15,15.2 | 28           | 25 |
| CVCL_B886       | GENEA078     | 9          | 75.00%    | X          | 10,11        | 17,24   | 15      | 12,13        | 8,10       | 11,13   | 11           | 12           | 12,13  | 14,15   | 28,30        | 22 |
| CVCL_B451       | OX-CO-1      | 9          | 75.00%    | X          | 12           |         |         | 12           | 8,12       |         | 11           | 11,12        |        |         | 30           |    |
| CVCL_1982       | CL-40        | 9          | 74.29%    | X          | 10,12        |         | 16      | 11           | 8,9        | 12,14   | 8,11         | 11,12        | 14     |         | 30,32.2      | 21 |
| CVCL_YC25       | GIBHi002-A   | 9          | 74.29%    | X          | 10,12        |         | 15,18   | 12,13        | 8,11       | 10,14   | 8,12         | 11,12        | 13,16  |         | 28,30        | 22 |
| CVCL_0936       | Hs 832(C).T  | 9          | 74.29%    | X          | 10,12        |         | 14,16   | 10,11        | 8,9        | 12,13   | 11,12        | 11,12        | 16,17  |         | 28,32.2      | 24 |
| CVCL_0814       | Hs 600.T     | 8          | 73.33%    | X,Y        | 10,12        |         |         | 11,12        | 8,9        |         | 11           | 11,12        |        |         |              |    |
| CVCL_0860       | Hs 704.Sk    | 8          | 73.33%    | X          | 10,12        |         |         | 11,12        | 8,10       |         | 11,12        | 11,12        |        |         |              |    |
| CVCL_0861       | Hs 704.T     | 8          | 73.33%    | X          | 10,12        |         |         | 11,12        | 8,10       |         | 11,12        | 11,12        |        |         |              |    |
| CVCL_0887       | Hs 742.Sk    | 8          | 73.33%    | X          | 10,12        |         |         | 12           | 8,9        |         | 9,12         | 11,12        |        |         |              |    |
| CVCL_0888       | Hs 742.T     | 8          | 73.33%    | X          | 10,12        |         |         | 12           | 8,9        |         | 9,12         | 11,12        |        |         |              |    |
| CVCL_B160       | HUES 29      | 9          | 72.73%    | X          | 10,12        |         | 14,15   | 11,12        | 8,9        | 11,13   | 11,12        | 11,12        | 14,16  |         | 31.2         | 21 |
| CVCL_3901       | EA.hy 926    | 8          | 72.73%    | X          | 10,11,12     |         |         | 11           | 8,9,10     |         | 11           | 11,12        |        |         |              |    |

|                 |                             |   |        |     |            |       |       |       |           |       |         |          |       |         |          |    |
|-----------------|-----------------------------|---|--------|-----|------------|-------|-------|-------|-----------|-------|---------|----------|-------|---------|----------|----|
| CVCL_B165       | HUES 33                     | 9 | 72.22% | X   | 10,13      | 17,24 | 14,15 | 12,13 | 9,11      | 11    | 8,11    | 11,12    | 13,20 | 14      | 28,29    | 23 |
| CVCL_2197       | SKW-3                       | 9 | 72.22% | X,Y | 10,12      | 19,25 | 15,18 | 12,13 | 8,12      | 11,14 | 8,12    | 11,12    | 13,18 | 13,15   | 28,29,30 | 24 |
| CVCL_A9W1       | GSC#452C                    | 8 | 71.43% | X   | 10,12      |       |       | 12,13 | 8         |       | 8,12    | 11       |       |         |          |    |
| CVCL_A9W2       | GSC#452P                    | 8 | 71.43% | X   | 10,12      |       |       | 12,13 | 8         |       | 8,12    | 11       |       |         |          |    |
| CVCL_4364       | NCI-H1622                   | 8 | 71.43% | X,Y | 10         |       |       | 12    | 10,12     |       | 11      | 11,12    |       |         |          |    |
| CVCL_4W97       | NCI-H23-Luc                 | 8 | 71.43% | X   | 10         |       |       | 12,13 | 9,10      |       | 12      | 11       |       |         |          |    |
| CVCL_G002       | HCC60                       | 9 | 70.97% | X   | 10         |       | 15    | 12,13 | 9,10      | 15    | 12      | 11       | 14    |         | 30       | 24 |
| CVCL_1458 Best  | NCI-H1184                   | 9 | 70.97% | X,Y | 10         |       | 14    | 12    | 12        | 10,11 | 11      | 11,12    | 16,20 |         | 32.2     | 22 |
| CVCL_1458 Worst | NCI-H1184                   | 9 | 64.52% | X,Y | 10         |       | 14    | 12    | 10,12     | 10,11 | 11      | 11,12    | 16,20 |         | 32.2     | 22 |
| CVCL_1547 Best  | NCI-H23                     | 9 | 70.97% | X   | 10         | 18,23 | 15    | 12,13 | 9,10      | 15    | 12      | 11       | 14,16 | 12,14   | 30       | 24 |
| CVCL_1547 Worst | NCI-H23                     | 9 | 64.52% | X   | 10         | 18,23 | 15    | 12    | 9,10      | 15    | 12      | 9,11     | 14,16 | 12,14   | 30       | 24 |
| CVCL_4613       | BDCM                        | 8 | 70.97% | X,Y | 10,11      |       |       | 12,13 | 9,11      |       | 11      | 10,11    |       |         |          |    |
| CVCL_0F60       | CCD-973Sk                   | 8 | 70.97% | X   | 11,12      |       |       | 12,13 | 8,11      |       | 11,12   | 11,12    |       |         |          |    |
| CVCL_1327       | KE-37                       | 8 | 70.97% | X,Y | 10,12      |       |       | 12,13 | 8,12      |       | 8,12    | 11,12    |       |         |          |    |
| CVCL_EE38       | SIGi001-A                   | 8 | 70.97% | X   | 10,12      |       |       | 12,13 | 8,11      |       | 8,12    | 11,12    |       |         |          |    |
| CVCL_2635 Best  | NCI-BL1184                  | 9 | 70.59% | X,Y | 10         |       | 14,15 | 11,12 | 10,12     | 10,11 | 11      | 11,12    | 16,20 |         | 28,32.2  | 22 |
| CVCL_2635 Worst | NCI-BL1184                  | 9 | 66.67% | X,Y | 10         |       | 14,15 | 11,12 | 10,12     | 10,11 | 11      | 11,12    | 16,20 |         | 28,32.2  | 22 |
| CVCL_S426       | NZM041                      | 9 | 70.59% | X   | 10,11      | 19,20 | 15,16 | 12,13 | 10        | 13,15 | 8,11    | 11,12    | 12,19 | 13,14   | 29,30    | 25 |
| CVCL_S424       | NZM047                      | 9 | 70.59% | X   | 10,11      | 19,20 | 15,16 | 12,13 | 10        | 13,15 | 8,11    | 11,12    | 12,19 | 13,14   | 29,30    | 25 |
| CVCL_1635       | Panc 03.27                  | 9 | 70.59% | X   | 10,11      |       | 15,16 | 12,13 | 8,13      | 13,14 | 11,12   | 12       | 18    |         | 29,30    | 22 |
| CVCL_A5SM       | Wilms11                     | 9 | 70.59% | X,Y | 10,12      |       | 15,17 | 12,13 | 8,9       | 13    | 12      | 11,12    | 14,21 |         | 29,30    | 23 |
| CVCL_S457       | Fsp 62891                   | 8 | 70.00% | X,Y | 7,10,12,13 |       |       | 12    | 8,9,11,12 |       | 8,11,14 | 11,12,13 |       |         |          |    |
| CVCL_1158       | D-392MG                     | 8 | 68.97% | X   | 12,13      |       |       | 12    | 12        |       | 8,14    | 11,12    |       |         |          |    |
| CVCL_0F29       | DFCI-LU011                  | 8 | 68.97% | X,Y | 10         |       |       | 12    | 9,12      |       | 11,12   | 11,12    |       |         |          |    |
| CVCL_AS83       | HBEC30-KT                   | 8 | 68.97% | X   | 10,11      |       |       | 11    | 8,9       |       | 11,12   | 11       |       |         |          |    |
| CVCL_0675       | Hs 2.We                     | 8 | 68.97% | X,Y | 10,12      |       |       | 12,13 | 8,9       |       | 11      | 13       |       |         |          |    |
| CVCL_6404       | HT-297.T                    | 8 | 68.97% | X,Y | 10,12      |       |       | 9,12  | 8,9       |       | 11,13   | 9,12     |       |         |          |    |
| CVCL_0871 Best  | Hs 729.T                    | 9 | 68.75% | X,Y | 10         |       | 17    | 11,12 | 8,9       | 10,14 | 11      | 11       | 12    |         | 28,31.2  | 19 |
| CVCL_0871 Worst | Hs 729.T                    | 9 | 66.67% | X,Y | 10         |       | 17    | 11,12 | 8,9       | 10,14 | 11,12   | 11       | 12    |         | 28,31.2  | 19 |
| CVCL_IT36       | NEM163                      | 9 | 68.75% | X,Y | 8,10       |       |       | 12,13 | 9         |       | 10,11   | 11       |       |         | 28,30    |    |
| CVCL_N707       | BT054                       | 8 | 68.75% | X   | 10,12      |       |       | 11,12 | 9,11      |       | 12,14   | 11,12    |       |         |          |    |
| CVCL_1058       | A-204                       | 9 | 68.57% | X   | 10,13      | 17,22 | 14,17 | 12    | 8,10      | 13,15 | 11,12   | 11,12    | 17,18 | 12,13   | 28,30    | 21 |
| CVCL_8607 Best  | 92-1 [Human uveal melanoma] | 9 | 66.67% | X   | 10,11      |       | 14,15 | 12,13 | 11        | 15    | 10,11   | 11,12    | 12,13 |         | 30       | 21 |
| CVCL_8607 Worst | 92-1 [Human uveal melanoma] | 9 | 48.48% | X   | 10,11      |       | 14,15 | 9,11  | 10,11     | 15    | 11,12   | 12       | 12,13 |         | 30       | 21 |
| CVCL_0202 Best  | Caov-4                      | 9 | 66.67% | X   | 10,11      | 17,20 | 16    | 11,13 | 8,10      | 12    | 12,14   | 9,11     | 21    | 11,12   | 28,33.2  | 22 |
| CVCL_0202 Worst | Caov-4                      | 9 | 64.71% | X   | 10         | 17,20 | 16    | 11    | 8,10      | 12    | 12,14   | 9,11     | 21    | 11,12   | 28,33.2  | 22 |
| CVCL_2415       | COR-L47                     | 9 | 66.67% | X,Y | 10,12      |       | 14    | 10,13 | 8,10      | 12,14 | 11      | 11,12    | 13,15 |         | 30,31.2  | 24 |
| CVCL_9011       | GENEA002                    | 9 | 66.67% | X,Y | 10,11      | 23    | 14,17 | 11,12 | 8,10      | 12,14 | 11      | 11,12    | 13,16 | 13,14   | 28,30    | 19 |
| CVCL_QX35       | GIS2014-SB3C16              | 9 | 66.67% | X,Y | 10,12      | 20    | 15,16 | 12    | 8,11      | 11,14 | 8       | 11       | 13    | 15,15.2 | 28,30    | 23 |
| CVCL_N127 Best  | GM09948                     | 9 | 66.67% | X,Y | 10,11,12   | 23    | 15,17 | 11,13 | 11        | 12,13 | 11      | 11       | 15,18 | 13,14   | 29,30    | 24 |
| CVCL_N127 Worst | GM09948                     | 9 | 62.50% | X,Y | 10,11      | 23    | 15,17 | 11,13 | 11        | 12,13 | 11      | 11       | 15,18 | 13,14   | 29,30    | 24 |
| CVCL_VF64       | HMGEC                       | 9 | 66.67% | X,Y | 10,12      |       | 15,17 | 10,13 | 8,11      | 13,15 | 9,14    | 8,11     | 12,16 |         | 29,30.2  | 23 |
| CVCL_B155       | HUES 24                     | 9 | 66.67% | X,Y | 10,12      | 19,23 | 11,17 | 10,12 | 9         | 10,13 | 12,14   | 9,12     | 13,18 | 14,15   | 30       | 21 |
| CVCL_0D39       | NZM075                      | 9 | 66.67% | X,Y | 11,12      | 20,24 | 15,16 | 11,12 | 8,9       | 16    | 8,11    | 11       | 17    | 14,15   | 28       | 20 |
| CVCL_0103       | SUP-B15                     | 9 | 66.67% | X,Y | 11,12      |       | 15,16 | 12,13 | 10,11     | 11,14 | 8,14    | 11,12    | 14    |         | 28,31    | 19 |
| CVCL_1738 Best  | TCCSUP                      | 9 | 66.67% | X   | 10         |       |       | 12    | 8,9       | 13    | 11,14   | 9,11     | 15    |         | 27,31.2  | 21 |
| CVCL_1738 Worst | TCCSUP                      | 9 | 62.50% | X   | 10         |       |       | 12    | 8,9       | 13    | 11      | 9,11     | 15    |         | 27,31.2  | 21 |

|                 |                   |   |        |     |       |       |             |          |       |       |       |          |          |         |         |    |
|-----------------|-------------------|---|--------|-----|-------|-------|-------------|----------|-------|-------|-------|----------|----------|---------|---------|----|
| CVCL_7740       | UM-SCC-3          | 9 | 66.67% | X   | 10,12 |       | 17          | 11,13    | 9,10  | 14    | 11,13 | 11,12    | 12,15    |         | 31.2    | 20 |
| CVCL_VW85       | ACOSC3            | 8 | 66.67% | X,Y | 10,12 |       |             | 12,13    | 9,10  |       | 8,11  | 11       |          |         |         |    |
| CVCL_2346       | CCD-1097Sk        | 8 | 66.67% | X   | 12    |       |             | 10,12    | 8,10  |       | 11,12 | 11,12    |          |         |         |    |
| CVCL_3300       | CCD-1106 KERTr    | 8 | 66.67% | X,Y | 10    |       |             | 11,12    | 8,12  |       | 11,12 | 8,12     |          |         |         |    |
| CVCL_YB37       | EDI045-A          | 8 | 66.67% | X,Y | 10,12 |       |             | 12,13    | 8,10  |       | 9,12  | 11       |          |         |         |    |
| CVCL_C603 Best  | FM74              | 8 | 66.67% | X,Y | 11,12 |       | 15,16       | 12,13    | 8,9   |       | 8,9   | 12       |          |         |         | 20 |
| CVCL_C603 Worst | FM74              | 8 | 57.14% | X,Y | 11,12 |       | 15,16       | 13       | 8,10  |       | 12    | 12       |          |         |         | 20 |
| CVCL_A9UJ       | GSC#277           | 8 | 66.67% | X,Y | 10,12 |       |             | 12       | 8,10  |       | 11    | 12,13    |          |         |         |    |
| CVCL_A9UQ       | GSC#314C          | 8 | 66.67% | X   | 10    |       |             | 12,13    | 10,12 |       | 11,14 | 11       |          |         |         |    |
| CVCL_A9UR       | GSC#314P          | 8 | 66.67% | X   | 10    |       |             | 12,13    | 10,12 |       | 11,14 | 11       |          |         |         |    |
| CVCL_J253       | HCC1419-Luc       | 8 | 66.67% | X   | 10,12 |       |             | 10,12    | 11    |       | 9,12  | 11,12    |          |         |         |    |
| CVCL_0T97       | HE48              | 8 | 66.67% | X   | 10,12 |       |             | 12,13    | 8,9   |       | 11    | 9,11     |          |         |         |    |
| CVCL_0809       | Hs 58.Fs          | 8 | 66.67% | X,Y | 10,12 |       |             | 11,12    | 9,10  |       | 10,11 | 11       |          |         |         |    |
| CVCL_1022       | Hs 919.Sk         | 8 | 66.67% | X   | 10,12 |       |             | 12       | 10    |       | 11,12 | 11,13    |          |         |         |    |
| CVCL_1023       | Hs 919.T          | 8 | 66.67% | X   | 10,12 |       |             | 12       | 10    |       | 11,12 | 11,13    |          |         |         |    |
| CVCL_5987       | JHU-012           | 8 | 66.67% | X,Y | 10    |       |             | 12,13    | 9,10  |       | 11    | 12       |          |         |         |    |
| CVCL_5991       | JHU-022           | 8 | 66.67% | X,Y | 10    |       |             | 12,13    | 9,10  |       | 11    | 12       |          |         |         |    |
| CVCL_5985       | JHU-06            | 8 | 66.67% | X,Y | 10    |       |             | 12,13    | 9,10  |       | 11    | 12       |          |         |         |    |
| CVCL_UR39       | K-562-luc2        | 8 | 66.67% | X   | 9,10  |       |             | 11,12,13 | 9,11  |       | 8     | 11,12    |          |         |         |    |
| CVCL_5144       | K562/MTX-2        | 8 | 66.67% | X   | 9,10  |       |             | 11,12    | 9,11  |       | 8     | 11,12    |          |         |         |    |
| CVCL_A119       | Ma-Mel-06         | 8 | 66.67% | X,Y | 10,12 |       | 14,15       | 12,13    | 10    |       | 11,13 | 12,13    |          |         |         | 22 |
| CVCL_1421       | MN-60             | 8 | 66.67% | X,Y | 11    |       |             | 12       | 10    |       | 11    | 11,12    |          |         |         |    |
| CVCL_V000       | NCI-H2818         | 8 | 66.67% | X,Y | 10,12 |       |             | 12,13    | 9,11  |       | 13    | 11,12    |          |         |         |    |
| CVCL_S410       | PIG1              | 8 | 66.67% | X   | 10,12 |       |             | 12,13    | 8,10  |       | 8,11  | 8,11     |          |         |         |    |
| CVCL_2200       | SPI-801           | 8 | 66.67% | X   | 10    |       |             | 12       | 9,11  |       | 8     | 11,12    |          |         |         |    |
| CVCL_2201       | SPI-802           | 8 | 66.67% | X   | 10    |       |             | 12       | 9,11  |       | 8     | 11,12    |          |         |         |    |
| CVCL_1063       | A-388             | 9 | 64.71% | X   | 10,11 |       | 13          | 11,13    | 10    | 12,13 | 11    | 11,12    | 14       |         | 28,30   | 22 |
| CVCL_1090 Best  | BONNA-12          | 9 | 64.71% | X   | 11,12 |       | 14,17       | 9,14     | 8,10  | 10,13 | 11,14 | 11,12    | 14       |         | 30,31.2 | 18 |
| CVCL_1090 Worst | BONNA-12          | 9 | 60.61% | X   | 11,12 |       | 14,17       | 9,14     | 8,10  | 10,13 | 11,14 | 12       | 14       |         | 30,31.2 | 18 |
| CVCL_DQ80       | BSS1-PBMC-IPS 4F4 | 9 | 64.71% | X   | 10    |       | 14,15       | 11,12    | 9,10  | 11,16 | 8,11  | 11,12    | 13,14    | 13,14   | 30      | 19 |
| CVCL_1107 Best  | CAL-27            | 9 | 64.71% | X   | 10,12 | 23,24 | 16          | 11,12    | 10    | 13,15 | 10,11 | 11,12    | 13       | 14,15.2 | 28,29   | 21 |
| CVCL_1107 Worst | CAL-27            | 9 | 64.71% | X   | 10,12 | 23,24 | 16          | 11,12    | 10    | 13,15 | 10,11 | 11,12    | 13       | 14,15.2 | 28,29   | 25 |
| CVCL_1275       | D425 Med          | 9 | 64.71% | X   | 9,12  |       | 14,17       | 12,13    | 11,12 | 11,15 | 11    | 11,12    | 15,17,18 |         | 29,33.2 | 20 |
| CVCL_YP34       | H58               | 9 | 64.71% | X,Y | 12    |       |             | 12       | 11,12 |       | 9,11  | 11,13    |          |         | 28,30   |    |
| CVCL_1251       | HCC1419           | 9 | 64.71% | X   | 10,12 |       | 14,17       | 10,12    | 11    | 15    | 9,12  | 11,12    | 14       |         | 27,30   | 20 |
| CVCL_5135 Best  | HCC461            | 9 | 64.71% | X   | 10,12 |       | 15,18       | 10,13    | 9,11  | 13,14 | 10,11 | 11,12    | 12,14    |         | 30      | 21 |
| CVCL_5135 Worst | HCC461            | 9 | 64.71% | X,Y | 10,12 |       | 15,18       | 10,13    | 9,11  | 13,14 | 10,11 | 11,12    | 12,14    |         | 30      | 21 |
| CVCL_D605 Best  | JJ012             | 9 | 64.71% | X   | 10    | 20,23 | 15,16,17,18 | 11,12    | 8,10  | 13    | 11    | 11,12    | 15       | 12,13   | 28,29   | 21 |
| CVCL_D605 Worst | JJ012             | 9 | 58.82% | X,Y | 10    | 20,23 | 16,17       | 11,12    | 8,10  | 13    | 11    | 11,12    | 15,17    | 12,13   | 28,29   | 21 |
| CVCL_0004 Best  | K-562             | 9 | 64.71% | X   | 9,10  | 17    | 16          | 11,12,13 | 9,11  | 12    | 8     | 11,12    | 15       | 14,14.2 | 29,30   | 21 |
| CVCL_0004 Worst | K-562             | 9 | 52.94% | X   | 9,10  | 17    | 16          | 11,12    | 9,11  | 12    | 8     | 11,12,13 | 15,16    | 14,14.2 | 29,31   | 21 |
| CVCL_WR77       | LaNCE hiPSC-23    | 9 | 64.71% | X   | 12    | 19,20 | 15          | 12,13    | 11,12 | 10,15 | 11,14 | 8,11     | 15,18    | 13,15   | 28,29   | 23 |
| CVCL_1380 Best  | Loucy             | 9 | 64.71% | X   | 11,12 | 21,22 | 15,19       | 12       | 9,10  | 12,13 | 11,13 | 11       | 15,16    | 14      | 27,30   | 22 |
| CVCL_1380 Worst | Loucy             | 9 | 62.86% | X   | 11,12 | 21,22 | 15,19       | 11,12    | 9,10  | 12,13 | 11,13 | 11       | 15,16    | 14      | 27,30   | 22 |
| CVCL_RP45       | LUTC-8            | 9 | 64.71% | X,Y | 12,13 | 19,23 | 15          | 12,13    | 9,10  | 10,11 | 14    | 11,12    | 13,15    | 13,14   | 29,30   | 22 |
| CVCL_A1WQ       | RCNSI001-A        | 9 | 64.71% | X   | 10,12 |       |             | 12,13    | 8,11  |       | 11,14 | 13       |          |         | 28,31.2 |    |
| CVCL_A1WR       | RCNSI001-B        | 9 | 64.71% | X   | 10,12 |       |             | 12,13    | 8,11  |       | 11,14 | 13       |          |         | 28,31.2 |    |
| CVCL_A1WS       | RCNSI002-A        | 9 | 64.71% | X   | 10,12 |       |             | 12,13    | 8,11  |       | 11,14 | 13       |          |         | 28,31.2 |    |

|                 |               |   |        |     |       |       |       |       |       |       |       |       |       |       |         |    |
|-----------------|---------------|---|--------|-----|-------|-------|-------|-------|-------|-------|-------|-------|-------|-------|---------|----|
| CVCL_A1WT       | RCNSI002-B    | 9 | 64.71% | X   | 10,12 |       |       | 12,13 | 8,11  |       | 11,14 | 13    |       |       | 28,31.2 |    |
| CVCL_5593       | SUM225CWN     | 9 | 64.71% | X   | 10,12 |       | 16,19 | 11,13 | 8,9   | 15    | 12    | 11    | 14    |       | 30,33.2 | 24 |
| CVCL_4232       | TC-215        | 9 | 64.71% | X,Y | 11,12 | 16,26 | 14,17 | 12,13 | 8,10  | 12,16 | 12    | 12    | 14,16 | 14    | 28,34.2 | 19 |
| CVCL_W921       | THJ-21T       | 9 | 64.71% | X,Y | 11,15 |       | 15,17 | 12,13 | 8,10  | 9,14  | 11,12 | 11,12 | 13,15 |       | 30      | 24 |
| CVCL_A15S       | TOV-3392D     | 9 | 64.71% | X   | 12    |       |       | 11,13 | 9,11  |       | 12,14 | 9,11  |       |       | 28,30   |    |
| CVCL_A5TC       | CAISMOV24     | 9 | 64.52% |     | 12    | 17    | 16,17 | 12,13 | 8,12  | 10,13 | 11,12 | 12    | 12,19 | 13,14 | 30,32.2 | 23 |
| CVCL_2059 Best  | HCC366        | 9 | 64.52% | X   | 10,12 |       | 15,17 | 12    | 10,11 | 15    | 11,13 | 11    | 19    |       | 28      | 19 |
| CVCL_2059 Worst | HCC366        | 9 | 60.00% | X   | 10,12 |       | 15,17 | 12    | 10,11 | 15    | 13    | 11    | 19    |       | 28      | 19 |
| CVCL_V579 Best  | HCC4017       | 9 | 64.52% | X   | 10,11 |       | 16    | 11    | 8,9   | 13,14 | 12    | 11    | 16    |       | 28,30   | 20 |
| CVCL_V579 Worst | HCC4017       | 9 | 62.50% | X   | 10,11 |       | 16    | 11    | 8,9   | 13,14 | 12    | 11    | 16    |       | 28,30   | 20 |
| CVCL_0031 Best  | MCF-7         | 9 | 64.52% | X   | 10    | 21,23 | 16    | 12    | 8,9   | 10,14 | 11    | 11,12 | 14    | 13,14 | 30      | 23 |
| CVCL_0031 Worst | MCF-7         | 9 | 62.50% | X   | 10    | 21,23 | 16    | 11,12 | 8,9   | 10,14 | 11    | 11,12 | 14    | 13,14 | 30      | 23 |
| CVCL_0U80       | MCF-7/HER2-18 | 9 | 64.52% | X   | 10    |       | 16    | 12    | 8,9   | 10,14 | 11    | 11,12 | 14    |       | 30      | 23 |
| CVCL_M436       | MCF-7/TAMR-1  | 9 | 64.52% | X   | 10    |       | 16    | 12    | 8,9   | 10,14 | 11    | 11,12 | 14    |       | 30      | 23 |
| CVCL_S429       | NZM039        | 9 | 64.52% | X,Y | 10    | 19,20 | 14    | 12    | 8,10  | 13,15 | 11,14 | 10,12 | 13,19 | 14,16 | 30      | 21 |
| CVCL_6183       | SK-RC-26A     | 9 | 64.52% | X   | 11,12 | 19    | 16    | 13    | 8,9   | 14    | 11    | 11    | 13,14 | 15.2  | 28,30   | 20 |
| CVCL_3120       | SK-RC-26B     | 9 | 64.52% | X   | 11,12 | 19    | 16    | 13    | 8,9   | 14    | 11    | 11    | 13    | 15.2  | 28,30   | 20 |
| CVCL_2745       | UM-UC-11      | 9 | 64.52% | X,Y | 10    |       | 15,16 | 12    | 8,12  | 11,13 | 11,14 | 11    | 13    |       | 30      | 20 |
| CVCL_1047       | 380           | 8 | 64.52% | X,Y | 10,11 |       |       | 11,13 | 9,11  |       | 11,12 | 11,12 |       |       |         |    |
| CVCL_2394       | CCD-39Lu      | 8 | 64.52% | X   | 10,12 |       |       | 11,12 | 9,12  |       | 11    | 11,13 |       |       |         |    |
| CVCL_2395       | CCD-39Sk      | 8 | 64.52% | X   | 10,12 |       |       | 11,12 | 9,12  |       | 11    | 11,13 |       |       |         |    |
| CVCL_A9UD       | GSC#221       | 8 | 64.52% | X,Y | 10    |       |       | 11,13 | 8,13  |       | 8,11  | 11,12 |       |       |         |    |
| CVCL_A9UT       | GSC#318       | 8 | 64.52% | X,Y | 10,12 |       |       | 12    | 9,10  |       | 11,12 | 11,12 |       |       |         |    |
| CVCL_D095       | HES-5         | 8 | 64.52% | X,Y | 10,11 |       |       | 10,12 | 9,13  |       | 11    | 11,12 |       |       |         |    |
| CVCL_0833       | Hs 67         | 8 | 64.52% | X   | 11,12 |       |       | 12    | 8,12  |       | 11,12 | 11,13 |       |       |         |    |
| CVCL_R709       | Hs 677.Rec    | 8 | 64.52% | X   | 11,12 |       |       | 12    | 9,11  |       | 13,14 | 11,12 |       |       |         |    |
| CVCL_0837       | Hs 677.Sk     | 8 | 64.52% | X   | 11,12 |       |       | 12    | 9,11  |       | 13,14 | 11,12 |       |       |         |    |
| CVCL_0838       | Hs 677.Tg     | 8 | 64.52% | X   | 11,12 |       |       | 12    | 9,11  |       | 13,14 | 11,12 |       |       |         |    |
| CVCL_0F27       | HUVEC-CS      | 8 | 64.52% | X   | 11,12 |       |       | 11,12 | 8,12  |       | 9,11  | 11,12 |       |       |         |    |
| CVCL_6413       | KMA           | 8 | 64.52% | X,Y | 10,12 |       |       | 12,13 | 11,12 |       | 11,12 | 12,13 |       |       |         |    |
| CVCL_6416       | LTR228        | 8 | 64.52% | X,Y | 11,12 |       |       | 12,13 | 9,12  |       | 11    | 11,12 |       |       |         |    |
| CVCL_L224       | OKF6/TERT-1   | 8 | 64.52% | X   | 11,12 |       |       | 12,13 | 8,10  |       | 11    | 11,12 |       |       |         |    |
| CVCL_L225       | OKF6/TERT-2   | 8 | 64.52% | X,Y | 11,12 |       |       | 12,13 | 8,10  |       | 11    | 11,12 |       |       |         |    |
| CVCL_B347       | SA001         | 8 | 64.52% | X,Y | 10,13 |       |       | 12,13 | 8,10  |       | 11,12 | 12,13 |       |       |         |    |
| CVCL_3796       | SKW 6.4       | 8 | 64.52% | X,Y | 11,12 |       |       | 12,13 | 9,11  |       | 11    | 11,12 |       |       |         |    |
| CVCL_1722 Best  | SW1783        | 8 | 64.52% | X,Y | 10,13 |       |       | 12,13 | 9,13  |       | 9,11  | 12    |       |       |         |    |
| CVCL_1722 Worst | SW1783        | 8 | 60.00% | X,Y | 10,13 |       |       | 12    | 9,13  |       | 9,11  | 12    |       |       |         |    |
| CVCL_AR68       | TK6 (IVGT)    | 8 | 64.52% | X,Y | 11,12 |       |       | 12,13 | 9,11  |       | 11    | 11,12 |       |       |         |    |
| CVCL_2733       | TK6TGR        | 8 | 64.52% | X,Y | 11,12 |       |       | 12,13 | 9,11  |       | 11    | 11,12 |       |       |         |    |
| CVCL_6741       | WI-L2-729HF2  | 8 | 64.52% | X,Y | 11,12 |       |       | 12,13 | 9,11  |       | 11    | 11,12 |       |       |         |    |
| CVCL_2761 Best  | WIL2 NS       | 8 | 64.52% | X,Y | 11,12 |       |       | 12,13 | 9,12  |       | 11    | 11,12 |       |       |         |    |
| CVCL_2761 Worst | WIL2 NS       | 8 | 58.06% | X,Y | 11,12 |       |       | 12,13 | 9,12  |       | 11    | 11,12 |       |       |         |    |
| CVCL_3809       | WIL2 S        | 8 | 64.52% | X,Y | 11,12 |       |       | 12,13 | 9,11  |       | 11    | 11,12 |       |       |         |    |
| CVCL_RZ81       | XYFMGG23G     | 8 | 64.52% | X,Y | 10,11 |       |       | 11,12 | 8,9   |       | 11,12 | 11    |       |       |         |    |
| CVCL_0165       | BCBL-1        | 8 | 64.29% | X   | 12    |       |       | 11,13 | 8,9   |       | 11,12 | 12    |       |       |         |    |
| CVCL_2382       | CCD-19Lu      | 8 | 64.29% | X   | 10,12 |       |       | 12    | 9,11  |       | 11,12 | 11    |       |       |         |    |
| CVCL_C617 Best  | FM93/2        | 8 | 64.29% | X   | 12,14 |       | 18    | 11,12 | 9     |       | 11    | 11,12 |       |       |         | 20 |
| CVCL_C617 Worst | FM93/2        | 8 | 62.07% | X   | 12,14 |       | 18    | 11,12 | 9     |       | 11    | 11,12 |       |       |         | 20 |
| CVCL_G356       | HT-29-MTX-E12 | 8 | 64.29% | X   | 11,12 |       |       | 11,12 | 10    |       | 11    | 11,12 |       |       |         |    |

|                 |                |   |        |     |          |       |       |       |       |       |       |       |       |         |         |    |
|-----------------|----------------|---|--------|-----|----------|-------|-------|-------|-------|-------|-------|-------|-------|---------|---------|----|
| CVCL_A919       | chHES-183      | 9 | 62.86% | X,Y | 10,12    |       | 16,18 | 10,11 | 8,9   | 12,16 | 11,14 | 12    | 16    |         | 28,29   | 16 |
| CVCL_6594       | CHLA-15        | 9 | 62.86% | X   | 10,12    | 17,26 | 16    | 12,15 | 9,11  | 13    | 10,11 | 11,13 | 15,19 | 14,15   | 30,31.2 | 23 |
| CVCL_2410       | COR-L26        | 9 | 62.86% | X   | 12,13    |       | 18    | 11,13 | 9,11  | 11,14 | 11    | 11,13 | 15    |         | 28,30   | 18 |
| CVCL_QX37       | GIS2014-WT3C16 | 9 | 62.86% | X,Y | 10,12    | 20    | 16    | 10,12 | 8,11  | 11,14 | 9,10  | 11,12 | 13    | 15,15.2 | 28,30   | 18 |
| CVCL_2521 Best  | HT29/219       | 9 | 62.86% | X   | 11,12    |       | 15,17 | 11,12 | 10    | 10    | 11,12 | 11,12 | 13    |         | 28,30   | 19 |
| CVCL_2521 Worst | HT29/219       | 9 | 60.61% | X   | 11       |       | 15,17 | 11,12 | 10    | 10    | 11    | 11,12 | 13    |         | 28,30   | 19 |
| CVCL_2959       | HUVEC-C        | 9 | 62.86% | X   | 11,12    |       | 16    | 11,12 | 8,12  | 14,16 | 9,11  | 11,12 | 13,17 |         | 28,31   | 21 |
| CVCL_X151       | JFEN           | 9 | 62.86% | X,Y | 12,13    | 20,24 | 16,18 | 11,12 | 8,10  | 11,14 | 11,12 | 9,12  | 12,18 | 14,15   | 28,30   | 20 |
| CVCL_VE24       | KITI001-A      | 9 | 62.86% | X,Y | 12,13    | 19,23 | 15,17 | 12,13 | 9,12  | 12,14 | 11    | 11,12 | 14    | 14,16.2 | 30,31   | 22 |
| CVCL_VE25       | KITI001-A-35   | 9 | 62.86% | X,Y | 12,13    | 19,23 | 15,17 | 12,13 | 9,12  | 12,14 | 11    | 11,12 | 14    | 14,16.2 | 30,31   | 22 |
| CVCL_WS27       | LN-2207GS      | 9 | 62.86% | X,Y | 10,11,12 | 19,25 | 14,16 | 11,12 | 8     | 11,13 | 11,12 | 12    | 11,14 | 13,14   | 30,31   | 22 |
| CVCL_WV16       | SJG-31         | 9 | 62.86% | X   | 10,12    |       | 16    | 10,11 | 9,12  | 12,14 | 13,14 | 10,11 | 13,18 |         | 30      | 21 |
| CVCL_6169       | SK-RC-2        | 9 | 62.86% | X,Y | 11,12    | 16,24 | 17    | 12    | 9,11  | 8,15  | 9,11  | 11,12 | 12,19 | 12,13   | 28,30   | 20 |
| CVCL_VE35       | TUSMi003-A     | 9 | 62.86% | X   | 10,12    | 20    | 17    | 12,13 | 8,9   | 10    | 8,9   | 11,12 | 17,19 | 12,13.2 | 29,30   | 24 |
| CVCL_S471 Best  | U-343MG        | 9 | 62.86% | X,Y | 10,12    | 22,24 | 15,17 | 12,13 | 9,11  | 13,14 | 9,13  | 9,12  | 23    | 13,14   | 31,33.2 | 19 |
| CVCL_S471 Worst | U-343MG        | 9 | 61.11% | X,Y | 10,12    | 22,24 | 15,17 | 12,13 | 9,11  | 13,14 | 9,13  | 9,12  | 21,23 | 13,14   | 31,33.2 | 19 |
| CVCL_RV27       | ULUNDI005-A    | 9 | 62.86% | X,Y | 11,12    |       |       | 12    | 8,11  |       | 11,13 | 9,11  |       |         | 28,33.2 |    |
| CVCL_0571       | UROtsa         | 9 | 62.86% | X   | 11,12    |       | 15    | 12,13 | 11,12 | 14    | 11,13 | 11,12 | 16    |         | 27,29   | 20 |
| CVCL_A5SC       | Wilms1-2l      | 9 | 62.86% | X   | 10,12    |       | 14,17 | 12,13 | 9,14  | 12,14 | 11,13 | 11,14 | 15,18 |         | 30,31   | 22 |
| CVCL_0144       | ARO            | 9 | 62.50% | X   | 11,12    |       | 15,17 | 11,12 | 10    | 10,16 | 11    | 11,12 | 12,13 |         | 30      | 20 |
| CVCL_8207       | GLC-2          | 9 | 62.50% | X,Y | 12,13    |       | 17    | 12,13 | 9,12  | 12    | 14    | 12    | 15,18 |         | 30,32   | 21 |
| CVCL_1269 Best  | HCC4006        | 9 | 62.50% | X   | 10       |       | 18    | 12    | 9,12  | 10,14 | 11,12 | 11,12 | 19    |         | 31      | 21 |
| CVCL_1269 Worst | HCC4006        | 9 | 58.06% | X   | 10       |       | 18    | 12    | 9,12  | 10,14 | 11,12 | 12    | 19    |         | 31      | 21 |
| CVCL_D224       | HNO41          | 9 | 62.50% | X   | 10       | 27    | 17    | 10,13 | 8     | 13    | 12    | 11,12 | 12    | 14      | 30      | 22 |
| CVCL_EG32       | JVE774         | 9 | 62.50% | X,Y | 10,11    |       |       | 12    | 8     |       | 11,12 | 9,12  |       |         | 28,29   |    |
| CVCL_2094 Best  | KPL-1          | 9 | 62.50% | X   | 10       |       |       | 11,12 | 8,9   |       | 11    | 11,12 |       |         | 30      |    |
| CVCL_2094 Worst | KPL-1          | 9 | 60.61% | X   | 10       |       |       | 11,12 | 8,9   |       | 10,11 | 11,12 |       |         | 30      |    |
| CVCL_UC24       | LM-MEL-9       | 9 | 62.50% | X,Y | 11       |       |       | 13    | 9,11  |       | 11    | 11,12 |       |         | 29,30   |    |
| CVCL_1D49       | MCF-7/164R-4   | 9 | 62.50% | X   | 10       |       | 16    | 11,12 | 8,9   | 10,14 | 11    | 11,12 | 14    |         | 30      | 23 |
| CVCL_1D39       | MCF-7/164R-7   | 9 | 62.50% | X   | 10       |       | 16    | 11,12 | 8,9   | 10,14 | 11    | 11,12 | 14    |         | 30      | 23 |
| CVCL_1D42       | MCF-7/TAMR-4   | 9 | 62.50% | X   | 10       |       | 16    | 11,12 | 8,9   | 10,14 | 11    | 11,12 | 14    |         | 30      | 23 |
| CVCL_1D43       | MCF-7/TAMR-7   | 9 | 62.50% | X   | 10       |       | 16    | 11,12 | 8,9   | 10,14 | 11    | 11,12 | 14    |         | 30      | 23 |
| CVCL_6860       | MCF-7B         | 9 | 62.50% | X   | 10       | 21,23 | 16    | 11,12 | 8,9   | 10,14 | 11    | 11,12 | 14    | 13,14   | 30      | 23 |
| CVCL_XD68       | MCF7-Cas9-542  | 9 | 62.50% | X   | 10       | 21,23 | 16    | 11,12 | 8,9   | 10,14 | 11    | 11,12 | 14    | 13,14   | 30      | 23 |
| CVCL_XD69       | MCF7-Cas9-543  | 9 | 62.50% | X   | 10       | 21,23 | 16    | 11,12 | 8,9   | 10,14 | 11    | 11,12 | 14    | 13,14   | 30      | 23 |
| CVCL_XD70       | MCF7-Cas9-544  | 9 | 62.50% | X   | 10       | 21,23 | 16    | 11,12 | 8,9   | 10,14 | 11    | 11,12 | 14    | 13,14   | 30      | 23 |
| CVCL_0426 Best  | MG-63          | 9 | 62.50% | X,Y | 10,12    | 17,24 | 15    | 11,12 | 10    | 13    | 11    | 11,12 | 16    | 13,14   | 30      | 21 |
| CVCL_0426 Worst | MG-63          | 9 | 58.06% | X,Y | 10,12    | 17,24 | 15    | 11,12 | 10    | 13    | 11    | 11    | 16    | 13,14   | 30      | 21 |
| CVCL_2638       | NCI-BL1395     | 9 | 62.50% | X   | 12       | 17,24 | 15,18 | 12    | 8     | 12,14 | 10,14 | 11,13 | 12,14 | 13,16   | 28,29   | 18 |
| CVCL_1507       | NCI-H1930      | 9 | 62.50% | X   | 12       |       | 16    | 13    | 9,10  | 12,14 | 8,11  | 11    | 12,19 |         | 30      | 21 |
| CVCL_0D37       | NZM073         | 9 | 62.50% | X   | 12       | 19,20 | 16    | 12    | 8,12  | 10,13 | 12,13 | 12    | 12,18 | 14,15   | 30      | 21 |
| CVCL_WV09       | SJG-8          | 9 | 62.50% | X,Y | 11,12    |       | 15,17 | 9,12  | 9     | 10,13 | 11    | 10,11 | 12,16 |         | 28,30   | 21 |
| CVCL_E998       | WaGa           | 9 | 62.50% | X,Y | 12       |       | 14    | 12    | 10    | 10,13 | 8,13  | 11,12 | 10,13 |         | 28,30   | 19 |
| CVCL_2350       | CCD-1100Sk     | 8 | 62.50% | X   | 10,11    |       |       | 12,13 | 7,9   |       | 9,11  | 9,11  |       |         |         |    |
| CVCL_2357       | CCD-1118Sk     | 8 | 62.50% | X   | 11,12    |       |       | 12,13 | 9,10  |       | 11,12 | 11,13 |       |         |         |    |
| CVCL_X503       | U-2946         | 8 | 62.50% | X,Y | 10,11    |       |       | 11,12 | 8,10  |       | 11,12 | 11,12 |       |         |         |    |
| CVCL_1500       | NCI-H1869      | 9 | 62.07% | X   | 10       |       | 17    | 11    | 8,9   | 13,14 | 11    | 12    | 12,18 |         | 31      | 22 |
| CVCL_V610       | SLR24          | 9 | 62.07% | X   | 10,12    |       |       | 12    | 8     |       | 11,12 | 11    |       |         | 30      |    |
| CVCL_2330       | CCD-1068Sk     | 8 | 62.07% | X   | 9        |       |       | 12,13 | 8,9   |       | 8,11  | 11,12 |       |         |         |    |

|           |             |   |        |     |       |  |  |       |       |  |       |       |  |  |
|-----------|-------------|---|--------|-----|-------|--|--|-------|-------|--|-------|-------|--|--|
| CVCL_2338 | CCD-1086Sk  | 8 | 62.07% | X   | 10,12 |  |  | 11,13 | 9,12  |  | 12    | 11,12 |  |  |
| CVCL_4150 | Cri du Chat | 8 | 62.07% | X   | 10,12 |  |  | 10,11 | 8,11  |  | 11    | 11,12 |  |  |
| CVCL_A9T7 | GSC#1       | 8 | 62.07% | X   | 10    |  |  | 12,13 | 8,10  |  | 8     | 11,14 |  |  |
| CVCL_A9V5 | GSC#389     | 8 | 62.07% | X,Y | 10,11 |  |  | 12    | 9,10  |  | 8,11  | 11,12 |  |  |
| CVCL_A9VF | GSC#406     | 8 | 62.07% | X,Y | 10    |  |  | 12,13 | 10,12 |  | 14    | 9,12  |  |  |
| CVCL_0T89 | HE36        | 8 | 62.07% | X,Y | 10    |  |  | 12,13 | 8,12  |  | 11,12 | 9     |  |  |
| CVCL_2941 | HFb16d      | 8 | 62.07% | X,Y | 10,12 |  |  | 10,13 | 9,10  |  | 11    | 12,13 |  |  |
| CVCL_3290 | HIAE-65     | 8 | 62.07% | X   | 10,11 |  |  | 12    | 9,12  |  | 11,14 | 11,13 |  |  |
| CVCL_3294 | HIVE-65     | 8 | 62.07% | X   | 10,11 |  |  | 12    | 9,12  |  | 11,14 | 11,13 |  |  |
| CVCL_0720 | Hs 3.T      | 8 | 62.07% | X   | 10,11 |  |  | 11,12 | 9     |  | 11    | 11,12 |  |  |
| CVCL_0802 | Hs 571.T    | 8 | 62.07% | X   | 10    |  |  | 11    | 8,9   |  | 10,11 | 11,12 |  |  |
| CVCL_R717 | Hs 680.Li   | 8 | 62.07% | X   | 11,12 |  |  | 12    | 9,10  |  | 11,14 | 9,11  |  |  |
| CVCL_0840 | Hs 680.Rec  | 8 | 62.07% | X   | 11,12 |  |  | 12    | 9,10  |  | 11,14 | 9,11  |  |  |
| CVCL_0841 | Hs 680.Sk   | 8 | 62.07% | X   | 11,12 |  |  | 12    | 9,10  |  | 11,14 | 9,11  |  |  |
| CVCL_0842 | Hs 680.Tg   | 8 | 62.07% | X   | 11,12 |  |  | 12    | 9,10  |  | 11,14 | 9,11  |  |  |
| CVCL_0843 | Hs 680.Tr   | 8 | 62.07% | X   | 11,12 |  |  | 12    | 9,10  |  | 11,14 | 9,11  |  |  |
| CVCL_JM00 | K-562-GFP   | 8 | 62.07% | X   | 9,10  |  |  | 11,12 | 9,11  |  | 8     | 11,12 |  |  |
| CVCL_J257 | K562-Luc    | 8 | 62.07% | X   | 9,10  |  |  | 11,12 | 9,11  |  | 8     | 11,12 |  |  |



## Cell Line Short Tandem Repeat (STR) Profile Report

**Principal Investigator:**

**Institution:**

**Cell Line ID:** CHLA20

**Report Date:** February 25, 2022

**Submitting Researcher:**

**Sample Type Submitted:** Cultured cells

**Tracking ID:** CLA-Mycoplasma Testing-Request\_External -

**Profile Kit Requested:** GenePrint 10 (Promega)

\_2022.02.18

### STR Graphic Profile:

#### STR Profile:

| Loci    | CHLA20  |
|---------|---------|
| AMEL    | X       |
| CSF1PO  | 10,12   |
| D13S317 | 11      |
| D16S539 | 13      |
| D21S11  | 30,31.2 |
| D5S818  | 12,15   |
| D7S820  | 9,11    |
| TH01    | 6,7     |
| TPOX    | 8       |
| vWA     | 17      |

» Loci with one allele listed are homozygous for that STR marker.

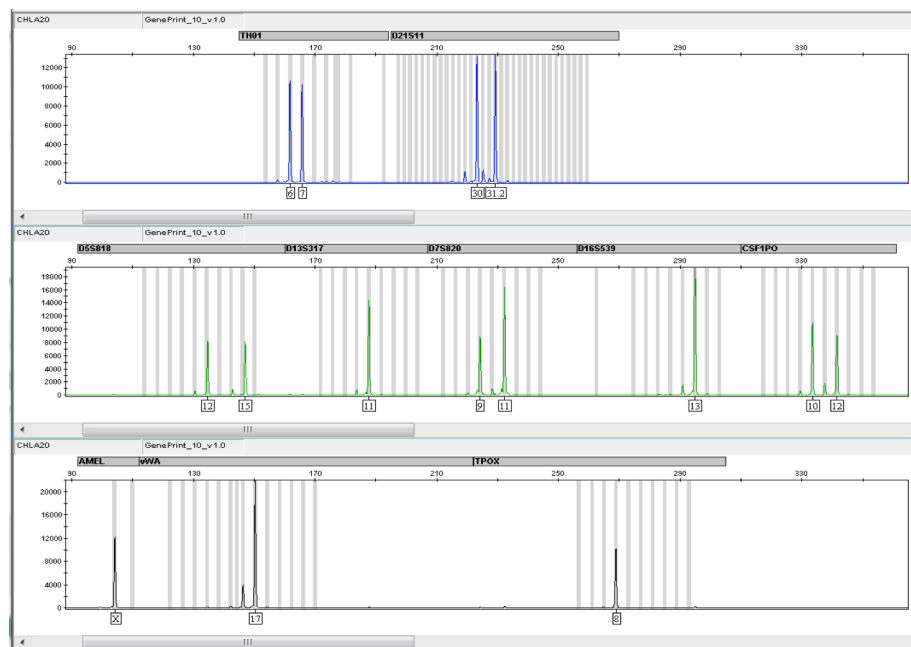

*Peaks that appear to be legitimate stutter or are spectral bleed-through artifacts are not labeled.*

- ✚ This report provides a STR profile for the cell line submitted, it does not automatically authenticate the cell line. Authentication is determined by comparison to the STR profile of the original donor tissue or cell stock. This STR profile can be used to verify the cell line is human, evaluate profile consistency between provisionally related cell isolates, detect cross-contamination with another human cell line (intra-species contamination), and to compare to profile databases, which we strongly recommend. This STR report does not rule out cross-contamination with an inter-species cell line (non-human).
- ✚ Please see the Pdf file *Additional Information* sent with the results for more information about interpreting your STR profile and links to profile databases.

**Principal Investigator:****Institution:****Cell Line ID:** CHLA20**Report Date:** February 25, 2022**Procedure:**

A Promega GenePrint 10 Kit is used to PCR amplify eight short tandem repeat (STR) loci plus a gender determining marker, Amelogenin. The PCR product is electrophoresed on an ABI Prism® 3730xl Genetic Analyzer using an ILS600 internal lane standard (Promega). Data is analyzed using GeneMapper® v 4.0 software (Applied Biosystems). An allelic ladder that contains fragments of the same lengths as many of the known alleles for the loci is used to determine the amplified sample fragments alleles. Appropriate positive and negative controls are used.

**Raw Data Table:** (STR markers with one allele listed are homozygous for that marker.)

| Sample Name | Marker  | Allele 1 | Allele 2 | Size 1 | Size 2 | Height 1 | Height 2 | Peak Area 1 | Peak Area 2 |
|-------------|---------|----------|----------|--------|--------|----------|----------|-------------|-------------|
| CHLA20      | AMEL    | X        |          | 104.17 |        | 12207    |          | 72574       |             |
| CHLA20      | CSF1PO  | 10       | 12       | 333.48 | 341.53 | 11012    | 9130     | 77411       | 64716       |
| CHLA20      | D13S317 | 11       |          | 187.69 |        | 14404    |          | 86654       |             |
| CHLA20      | D16S539 | 13       |          | 294.85 |        | 19420    |          | 132940      |             |
| CHLA20      | D21S11  | 30       | 31.2     | 223.2  | 229.2  | 13174    | 13433    | 81685       | 83137       |
| CHLA20      | D5S818  | 12       | 15       | 134.65 | 147.06 | 8206     | 8112     | 49896       | 48411       |
| CHLA20      | D7S820  | 9        | 11       | 224.23 | 232.29 | 8833     | 16347    | 56136       | 105509      |
| CHLA20      | TH01    | 6        | 7        | 161.75 | 165.68 | 10653    | 10286    | 63324       | 61565       |
| CHLA20      | TPOX    | 8        |          | 268.89 |        | 10265    |          | 67906       |             |
| CHLA20      | vWA     | 17       |          | 150.27 |        | 22040    |          | 134661      |             |

Cellosaurus

CLASTR 1.4.4  
The Cellosaurus STR Similarity Search Tool

|                                                                                                                                                                                                                                                                                                                                                                                                                                                                                                                                                                                                                                                                                                                                                                                                                                                                                                                                                                                                                                                                                                                                                                                                                                                                                                                                                                                                                      |                                                                                                                                                                                                                                                                                                                                                                                                                                                                                                            |                                                                                                                                                                                                                                                                                                                                                                                                                                                                                                                                                                                                 |                                                                                                                                                                                                                                                                                                                                                                                                            |                                                                                                                                                                                     |                                                                                                                                                                                                                                                                                                                                                                                                                                          |
|----------------------------------------------------------------------------------------------------------------------------------------------------------------------------------------------------------------------------------------------------------------------------------------------------------------------------------------------------------------------------------------------------------------------------------------------------------------------------------------------------------------------------------------------------------------------------------------------------------------------------------------------------------------------------------------------------------------------------------------------------------------------------------------------------------------------------------------------------------------------------------------------------------------------------------------------------------------------------------------------------------------------------------------------------------------------------------------------------------------------------------------------------------------------------------------------------------------------------------------------------------------------------------------------------------------------------------------------------------------------------------------------------------------------|------------------------------------------------------------------------------------------------------------------------------------------------------------------------------------------------------------------------------------------------------------------------------------------------------------------------------------------------------------------------------------------------------------------------------------------------------------------------------------------------------------|-------------------------------------------------------------------------------------------------------------------------------------------------------------------------------------------------------------------------------------------------------------------------------------------------------------------------------------------------------------------------------------------------------------------------------------------------------------------------------------------------------------------------------------------------------------------------------------------------|------------------------------------------------------------------------------------------------------------------------------------------------------------------------------------------------------------------------------------------------------------------------------------------------------------------------------------------------------------------------------------------------------------|-------------------------------------------------------------------------------------------------------------------------------------------------------------------------------------|------------------------------------------------------------------------------------------------------------------------------------------------------------------------------------------------------------------------------------------------------------------------------------------------------------------------------------------------------------------------------------------------------------------------------------------|
| <b>Markers</b>                                                                                                                                                                                                                                                                                                                                                                                                                                                                                                                                                                                                                                                                                                                                                                                                                                                                                                                                                                                                                                                                                                                                                                                                                                                                                                                                                                                                       |                                                                                                                                                                                                                                                                                                                                                                                                                                                                                                            | <b>Human</b>                                                                                                                                                                                                                                                                                                                                                                                                                                                                                                                                                                                    | <b>Mouse</b>                                                                                                                                                                                                                                                                                                                                                                                               | <b>Dog</b>                                                                                                                                                                          |                                                                                                                                                                                                                                                                                                                                                                                                                                          |
| <p><span style="color: green;">Amelogenin</span> <input type="text" value="X"/></p> <p><span style="color: blue;">CSF1PO</span> <input type="text" value="10,12"/></p> <p><span style="color: blue;">D2S1338</span> <input type="text"/></p> <p><span style="color: blue;">D3S1358</span> <input type="text"/></p> <p><span style="color: blue;">D5S818</span> <input type="text" value="12,15"/></p> <p><span style="color: blue;">D7S820</span> <input type="text" value="9,11"/></p> <p><span style="color: blue;">D8S1179</span> <input type="text"/></p> <p><span style="color: blue;">D13S317</span> <input type="text" value="11"/></p> <p><span style="color: blue;">D16S539</span> <input type="text" value="13"/></p> <p><span style="color: blue;">D18S51</span> <input type="text"/></p> <p><span style="color: blue;">D19S433</span> <input type="text"/></p> <p><span style="color: blue;">D21S11</span> <input type="text" value="30,31.2"/></p> <p><span style="color: blue;">FGA</span> <input type="text"/></p> <p><span style="color: blue;">Penta D</span> <input type="text"/></p> <p><span style="color: blue;">Penta E</span> <input type="text"/></p> <p><span style="color: blue;">TH01</span> <input type="text" value="6"/></p> <p><span style="color: blue;">TPOX</span> <input type="text" value="8"/></p> <p><span style="color: blue;">vWA</span> <input type="text" value="17"/></p> | <p>D1S1656 <input type="text"/></p> <p>D2S441 <input type="text"/></p> <p>D6S1043 <input type="text"/></p> <p>D10S1248 <input type="text"/></p> <p>D12S391 <input type="text"/></p> <p>D22S1045 <input type="text"/></p> <p>DXS101 <input type="text"/></p> <p>DYS391 <input type="text"/></p> <p>F13A01 <input type="text"/></p> <p>F13B <input type="text"/></p> <p>FESFPS <input type="text"/></p> <p>LPL <input type="text"/></p> <p>Penta C <input type="text"/></p> <p>SE33 <input type="text"/></p> | <p><input type="checkbox"/></p> | <p><b>Scoring</b></p> <p><i>Algorithms:</i></p> <p><input type="radio"/> Tanabe</p> <p><input type="radio"/> Masters (vs. query)</p> <p><input type="radio"/> Masters (vs. reference)</p> <p><i>Modes:</i></p> <p><input type="radio"/> Non-empty markers</p> <p><input type="radio"/> Query markers</p> <p><input type="radio"/> Reference markers</p> <p><input type="checkbox"/> Include Amelogenin</p> | <p><b>Filters</b></p> <p>Score Filter: <input type="text" value="60%"/></p> <p>Min Markers: <input type="text" value="8"/></p> <p>Max Results: <input type="text" value="200"/></p> | <p><b>Actions</b></p> <p style="text-align: center;"><input type="button" value="Search"/></p> <p style="text-align: center;"><input type="button" value="Load File"/></p> <p style="text-align: center;"><input type="button" value="Example"/></p> <p style="text-align: center;"><input type="button" value="Reset"/></p> <p style="text-align: center;"><input type="button" value="Help"/> <input type="button" value="About"/></p> |

Results of similarity search on the **7919 human** cell lines with STR profiles in Cellosaurus release **40.0**

| Export table                    |              |            |           |          |              |         |         |              |             |         |           |           |        |         |                |     |
|---------------------------------|--------------|------------|-----------|----------|--------------|---------|---------|--------------|-------------|---------|-----------|-----------|--------|---------|----------------|-----|
| Accession                       | Name         | N° Markers | Score     | Amel     | CSF1PO       | D2S1338 | D3S1358 | D5S818       | D7S820      | D8S1179 | D13S317   | D16S539   | D18S51 | D19S433 | D21S11         | FG  |
| <b>NA</b>                       | <b>Query</b> | <b>NA</b>  | <b>NA</b> | <b>X</b> | <b>10,12</b> |         |         | <b>12,15</b> | <b>9,11</b> |         | <b>11</b> | <b>13</b> |        |         | <b>30,31.2</b> |     |
| <a href="#">CVCL_6602</a>       | CHLA-20      | 9          | 92.86%    | X        | 10,12        | 17      | 16      | 12,15        | 9,11        | 13      | 11        | 13        | 15,19  | 14,15   | 30,31.2        | 23  |
| <a href="#">CVCL_AQ27</a>       | CHLA-255     | 9          | 92.86%    | X        | 10,12        | 17      | 16      | 12,15        | 9,11        | 13      | 11        | 13        | 15,19  | 14,15   | 30,31.2        | 23  |
| <a href="#">CVCL_6594</a>       | CHLA-15      | 9          | 86.67%    | X        | 10,12        | 17,26   | 16      | 12,15        | 9,11        | 13      | 10,11     | 11,13     | 15,19  | 14,15   | 30,31.2        | 23  |
| <a href="#">CVCL_I176</a>       | HMC3         | 8          | 72.00%    | X        | 10,11        |         |         | 11,12        | 9,11        |         | 11        | 12,13     |        |         |                |     |
| <a href="#">CVCL_Y546</a>       | I83-LCL      | 8          | 72.00%    | X,Y      | 10,11        |         |         | 11,12        | 9,11        |         | 11,13     | 13        |        |         |                |     |
| <a href="#">CVCL_2382</a>       | CCD-19Lu     | 8          | 69.57%    | X        | 10,12        |         |         | 12           | 9,11        |         | 11,12     | 11        |        |         |                |     |
| <a href="#">CVCL_1375 Best</a>  | LCLC-103H    | 9          | 69.23%    | X        | 10,12        | 16,19   | 16,17   | 12           | 8,11        | 12,14   | 11        | 13        | 19     | 15      | 29,31.2        | 22  |
| <a href="#">CVCL_1375 Worst</a> | LCLC-103H    | 9          | 66.67%    | X,Y      | 10,12        | 16,19   | 16,17   | 11,12        | 8,11        | 12,14   | 11        | 13        | 19     | 15      | 29,31.2        | 22  |
| <a href="#">CVCL_2394</a>       | CCD-39Lu     | 8          | 69.23%    | X        | 10,12        |         |         | 11,12        | 9,12        |         | 11        | 11,13     |        |         |                |     |
| <a href="#">CVCL_2395</a>       | CCD-39Sk     | 8          | 69.23%    | X        | 10,12        |         |         | 11,12        | 9,12        |         | 11        | 11,13     |        |         |                |     |
| <a href="#">CVCL_6413</a>       | KMA          | 8          | 69.23%    | X,Y      | 10,12        |         |         | 12,13        | 11,12       |         | 11,12     | 12,13     |        |         |                |     |
| <a href="#">CVCL_R285</a>       | XYFMGC50H    | 8          | 69.23%    | X,Y      | 10,12        |         |         | 12           | 9,11        |         | 11,14     | 10,13     |        |         |                |     |
| <a href="#">CVCL_RZ79</a>       | XYFMGG18B    | 8          | 69.23%    | X,Y      | 10,12        |         |         | 12,13        | 9           |         | 11,13     | 9,13      |        |         |                |     |
| <a href="#">CVCL_1069</a>       | ALL-PO       | 9          | 66.67%    | X        | 10,11        |         |         | 11,12        | 9,11        |         | 11,12     | 13        |        |         | 29,30          | TOP |
| <a href="#">CVCL_A9SP</a>       | NP4          | 9          | 66.67%    | X,Y      | 10,12        | 17,25   | 16,17   | 11,12        | 10,11       | 13      | 11,12     | 11,13     | 15,16  | 14,14.2 | 30             | 19  |
| <a href="#">CVCL_S417</a>       | NZM061       | 9          | 66.67%    | X,Y      | 11,12        | 16,18   | 17      | 11,12        | 11          | 12,13   | 11,13     | 13        | 12,13  | 14,15   | 29,30          | 19  |

|                 |               |   |        |     |          |       |       |          |        |       |       |       |          |       |         |    |
|-----------------|---------------|---|--------|-----|----------|-------|-------|----------|--------|-------|-------|-------|----------|-------|---------|----|
| CVCL_VP49       | BCJ-4T        | 8 | 66.67% | X,Y | 10,12    |       | 16,18 | 12       | 11     | 11,14 | 11,12 | 12    | 12,17    |       |         | 23 |
| CVCL_6404       | HT-297.T      | 8 | 66.67% | X,Y | 10,12    |       |       | 9,12     | 8,9    |       | 11,13 | 9,12  |          |       |         |    |
| CVCL_8504       | KYSE-1440     | 8 | 66.67% | X   | 10       |       |       | 12       | 9,11   |       | 11    | 9,13  |          |       |         |    |
| CVCL_B279       | S2-007        | 8 | 66.67% | X   | 11,12    |       |       | 11,12    | 9,11   |       | 9,11  | 9     |          |       |         |    |
| CVCL_F972       | S2-VP10       | 8 | 66.67% | X   | 11,12    |       |       | 11,12    | 9,11   |       | 9,11  | 9     |          |       |         |    |
| CVCL_5728       | CLS-54        | 9 | 64.29% | X   | 12       |       | 18    | 13       | 10,11  | 11    | 11    | 12,13 | 11,17,18 |       | 30,31.2 | 20 |
| CVCL_B160       | HUES 29       | 9 | 64.29% | X   | 10,12    |       | 14,15 | 11,12    | 8,9    | 11,13 | 11,12 | 11,12 | 14,16    |       | 31.2    | 21 |
| CVCL_2614       | MOG-G-UWW     | 9 | 64.29% | X,Y | 10,11    | 21,24 | 15    | 11,12    | 9,12   | 13,15 | 11    | 13    | 14,15    | 14    | 30,30.2 | 23 |
| CVCL_2901       | FLAM-76       | 8 | 64.00% | X,Y | 10,12    |       |       | 9,12     | 9,10   |       | 8,11  | 9     |          |       |         |    |
| CVCL_A9UJ       | GSC#277       | 8 | 64.00% | X,Y | 10,12    |       |       | 12       | 8,10   |       | 11    | 12,13 |          |       |         |    |
| CVCL_A9VM       | GSC#421       | 8 | 64.00% | X,Y | 10,12    |       |       | 10,12    | 9,11   |       | 11    | 10,12 |          |       |         |    |
| CVCL_A9W0       | GSC#450       | 8 | 64.00% | X   | 10       |       |       | 11,12    | 9,11   |       | 11,13 | 11,13 |          |       |         |    |
| CVCL_A9TH       | GSC#68        | 8 | 64.00% | X,Y | 10       |       |       | 11,12    | 10,11  |       | 10,11 | 11,13 |          |       |         |    |
| CVCL_0809       | Hs 58.Fs      | 8 | 64.00% | X,Y | 10,12    |       |       | 11,12    | 9,10   |       | 10,11 | 11    |          |       |         |    |
| CVCL_1022       | Hs 919.Sk     | 8 | 64.00% | X   | 10,12    |       |       | 12       | 10     |       | 11,12 | 11,13 |          |       |         |    |
| CVCL_1023       | Hs 919.T      | 8 | 64.00% | X   | 10,12    |       |       | 12       | 10     |       | 11,12 | 11,13 |          |       |         |    |
| CVCL_Y437       | I83-E95       | 8 | 64.00% | X,Y | 10,11    |       |       | 11,12    | 9,3,11 |       | 11,13 | 13    |          |       |         |    |
| CVCL_QW85       | MDA-T120      | 8 | 64.00% | X   | 12,14    |       |       | 11,12    | 10,11  |       | 11    | 13    |          |       |         |    |
| CVCL_1478       | NCI-H1573     | 8 | 64.00% | X   | 10,12    |       |       | 11,13    | 9,11   |       | 11,13 | 12    |          |       |         |    |
| CVCL_B280       | S2-013        | 8 | 64.00% | X   | 11,12    |       |       | 11,12    | 9,11   |       | 9,11  | 9     |          |       |         |    |
| CVCL_B281       | S2-020        | 8 | 64.00% | X   | 11,12    |       |       | 11,12    | 9,11   |       | 9,11  | 9     |          |       |         |    |
| CVCL_F971       | S2-CP8        | 8 | 64.00% | X   | 11,12    |       |       | 11,12    | 9,11   |       | 9,11  | 9     |          |       |         |    |
| CVCL_1698 Best  | SK-MG-1       | 8 | 64.00% | X   | 12,15    |       |       | 11,12    | 9,11   |       | 11    | 12,13 |          |       |         |    |
| CVCL_1698 Worst | SK-MG-1       | 8 | 58.33% | X   | 12,15    |       |       | 11,12    | 9      |       | 11    | 12,13 |          |       |         |    |
| CVCL_YU16       | NCC-MPNST4-C1 | 9 | 63.64% | X,Y | 12       |       |       | 12       | 11     |       | 10    | 9     |          |       | 30      |    |
| CVCL_3061       | NCR-G3        | 8 | 63.64% | X,Y | 9,12     |       |       | 12       | 11,13  |       | 11    | 13    |          |       |         |    |
| CVCL_0293 Best  | HEC-1-A       | 9 | 62.50% | X   | 10,12    | 18,19 | 15    | 11,14,15 | 9,11   | 13,14 | 11,12 | 12,13 | 16,21    | 13    | 30,31   | 21 |
| CVCL_0293 Worst | HEC-1-A       | 9 | 54.55% | X   | 10,13,14 | 18,19 | 15    | 11,15    | 9,11   | 13,14 | 11    | 12,13 | 16,21    | 13    | 30,31   | 21 |
| CVCL_9576       | GENYOi006-A   | 9 | 62.07% | X,Y | 10,12    | 21,22 | 14,15 | 10,12    | 9,11   | 15    | 11    | 9,15  | 14,16    | 12,14 | 27,30   | 20 |
| CVCL_YN83       | GENYOi006-A-1 | 9 | 62.07% | X,Y | 10,12    | 21,22 | 14,15 | 10,12    | 9,11   | 15    | 11    | 9,14  | 14,16    | 12,14 | 27,30   | 20 |
| CVCL_YN84       | GENYOi006-A-2 | 9 | 62.07% | X,Y | 10,12    | 21,22 | 14,15 | 10,12    | 9,11   | 15    | 11    | 9,14  | 14,16    | 12,14 | 27,30   | 20 |
| CVCL_YP34       | H58           | 9 | 62.07% | X,Y | 12       |       |       | 12       | 11,12  |       | 9,11  | 11,13 |          |       | 28,30   |    |
| CVCL_VR76       | ICCSiCi008-A  | 9 | 62.07% | X,Y | 10,12    |       |       | 11,12    | 8,11   |       | 9,11  | 12,13 |          |       | 30      |    |
| CVCL_EG16       | JVE015        | 9 | 62.07% | X   | 12       |       |       | 11,12    | 9,11   |       | 11,12 | 9     |          |       | 30,32.2 |    |
| CVCL_2993       | KMS-27        | 9 | 62.07% | X,Y | 10,12    |       | 16,17 | 10,12    | 11     | 11,12 | 10,11 | 11,12 | 14,16    |       | 30,32.2 | 22 |
| CVCL_S432       | NZM027        | 9 | 62.07% | X   | 11       | 17,23 | 17,20 | 11,12    | 9,11   | 11,12 | 11,13 | 12    | 12,14    | 12    | 30,31.2 | 22 |
| CVCL_2675       | OV7           | 9 | 62.07% | X   | 12,13    | 20,24 | 16    | 11,12    | 9,11   | 10,14 | 8,11  | 13    | 12,14    | 14    | 30,31.2 | 23 |
| CVCL_A1WQ       | RCNSi001-A    | 9 | 62.07% | X   | 10,12    |       |       | 12,13    | 8,11   |       | 11,14 | 13    |          |       | 28,31.2 |    |
| CVCL_A1WR       | RCNSi001-B    | 9 | 62.07% | X   | 10,12    |       |       | 12,13    | 8,11   |       | 11,14 | 13    |          |       | 28,31.2 |    |
| CVCL_A1WS       | RCNSi002-A    | 9 | 62.07% | X   | 10,12    |       |       | 12,13    | 8,11   |       | 11,14 | 13    |          |       | 28,31.2 |    |
| CVCL_A1WT       | RCNSi002-B    | 9 | 62.07% | X   | 10,12    |       |       | 12,13    | 8,11   |       | 11,14 | 13    |          |       | 28,31.2 |    |
| CVCL_1706 Best  | SNB-75        | 9 | 62.07% | X   | 10,12    | 17,23 | 17    | 12       | 9,11   | 12    | 8,12  | 11,13 | 18       | 13,14 | 30      | 19 |
| CVCL_1706 Worst | SNB-75        | 9 | 51.85% | X   | 10,12    | 17,23 | 17    | 12       | 9      | 12    | 8,12  | 11,13 | 18       | 13,14 | 30      | 19 |
| CVCL_3172       | SUIT-2        | 9 | 62.07% | X   | 11,12    |       | 16    | 11,12    | 9,11   | 14,15 | 9,11  | 9     | 16       |       | 29,30   | 20 |
| CVCL_1G08 Best  | HROC80 T1 M1  | 9 | 61.54% | X   | 12       |       |       | 12,13    | 9,11   |       | 8     | 10    |          |       | 30,30.2 |    |
| CVCL_1G08 Worst | HROC80 T1 M1  | 9 | 59.26% | X   | 12       |       |       | 12,13    | 9,11   |       | 8     | 10,15 |          |       | 30,30.2 |    |
| CVCL_A4GK       | hTERT-VFF E10 | 9 | 61.54% | X   | 10,11    |       | 14,18 | 11,12    | 11     | 10,13 | 13    | 11,13 | 15,19    |       | 29,31.2 | 22 |
| CVCL_A4GI       | hTERT-VFF E6  | 9 | 61.54% | X   | 10,11    |       | 14,18 | 11,12    | 11     | 10,13 | 13    | 11,13 | 15,19    |       | 29,31.2 | 22 |

|                 |                |   |        |     |              |              |              |              |             |              |                 |                 |              |       |                |    |
|-----------------|----------------|---|--------|-----|--------------|--------------|--------------|--------------|-------------|--------------|-----------------|-----------------|--------------|-------|----------------|----|
| CVCL_A4GJ       | hTERT-VFF E7   | 9 | 61.54% | X   | 10,11        |              | 14,18        | 11,12        | 11          | 10,13        | 13              | 11,13           | 15,19        |       | 29,31.2        | 22 |
| CVCL_A625 Best  | IPH-926        | 9 | 61.54% | X   | 10,12        | 19,20        | 15           | 11           | 9,11        | 13,15        | 11              | 12              | 12,22        | 16    | 30             | 19 |
| CVCL_A625 Worst | IPH-926        | 9 | 53.85% | X   | 10,12        | 19,20        | 15           | 11           | 9,11        | 13,15        | 11              | 12              | 12,22        | 16    | 30             | 19 |
| CVCL_RP46       | LUTC-10        | 9 | 61.54% | X,Y | 11,12        | 17,25        | 14,16        | 11           | 9,11        | 13,14        | 11,14           | 9,11            | 14           | 14    | 30             | 19 |
| CVCL_0485 Best  | PLC/PRF/5      | 9 | 61.54% | X   | 10           | <u>19</u>    | 15           | 12           | 9,11        | 13,16        | 11,12           | 13              | 17           | 11,13 | 30,33.2        | 19 |
| CVCL_0485 Worst | PLC/PRF/5      | 9 | 59.26% | X   | 10           | <u>19,22</u> | 15           | 12           | 9,11        | 13,16        | 11,12           | 13              | 17           | 11,13 | 30,33.2        | 19 |
| CVCL_0167 Best  | SK-N-BE(2)-M17 | 9 | 61.54% | X   | 10           | <u>17,23</u> | 19           | 12           | 9,10        | 13,14        | 11              | <u>11</u>       | <u>14</u>    | 12,13 | 30,32.2        | 22 |
| CVCL_0167 Worst | SK-N-BE(2)-M17 | 9 | 48.00% | X   | 10           | <u>23</u>    | 19           | 12           | 9,10        | 13,14        | 11              | <u>9,11</u>     | <u>16,26</u> | 12,13 | 30,32.2        | 22 |
| CVCL_IR61       | U3013MG        | 9 | 61.54% | X   | 10,12        | 25,26        | 17,19        | 12           | 9,11        | 13,14        | 14              | 10              | 13,14        | 14    | 31.2,32.2      | 18 |
| CVCL_C279       | WM3918         | 9 | 61.54% | X,Y | 12           | 19,24        | 17           | 11,12        | 12          | 13,16        | 11              | 10,13           | 9,13         | 14,16 | 28,30          | 20 |
| CVCL_6364       | 9D10           | 8 | 61.54% | X,Y | 10,12        |              |              | 11,12        | 8,11        |              | 9,13            | 11,13           |              |       |                |    |
| CVCL_YB33       | EDI041-A       | 8 | 61.54% | X   | 10,12        |              |              | 11,12        | 11,12       |              | 11,12           | 12,13           |              |       |                |    |
| CVCL_2490       | HG-261         | 8 | 61.54% | X,Y | 11,12        |              |              | 11,12        | 10,11       |              | 9,11            | 12,13           |              |       |                |    |
| CVCL_3519       | Hs 207.T       | 8 | 61.54% | X   | 10,12        |              |              | 12           | 11,12       |              | 11,12           | 11,12           |              |       |                |    |
| CVCL_0695       | Hs 222.Sp      | 8 | 61.54% | X   | 10,12        |              |              | 11,12        | 9,11        |              | 9,11            | 12,13           |              |       |                |    |
| CVCL_0747       | Hs 401.Lu      | 8 | 61.54% | X   | 10,12        |              |              | 11,13        | 9,11        |              | 11,12           | 8,9             |              |       |                |    |
| CVCL_0859       | Hs 701.T       | 8 | 61.54% | X   | 10,12        |              |              | 10,12        | 11,12       |              | 11,12           | 11              |              |       |                |    |
| CVCL_9Q53       | HUVEC/TERT2    | 8 | 61.54% | X   | 12           |              |              | 15,16        | 9,11        |              | 11,12           | 9,13            |              |       |                |    |
| CVCL_UJ14       | JMP-1          | 8 | 61.54% | X,Y | 11,12        |              |              | 11,12        | 11,12       |              | 11              | 9,13            |              |       |                |    |
| CVCL_3019       | Marcus         | 8 | 61.54% | X   | 12,15        |              |              | 11,12        | 9,11        |              | 11              | 12,13           |              |       |                |    |
| CVCL_2558       | XP6BR LCL      | 8 | 61.54% | X,Y | 10,12        |              |              | 11,12        | 8,12        |              | 11,12           | 9,13            |              |       |                |    |
| CVCL_R274       | XYFMGC07K      | 8 | 61.54% | X,Y | 10,12        |              |              | 11,13        | 10,11       |              | 11,13           | 12,13           |              |       |                |    |
| CVCL_V643       | CHL-2          | 8 | 60.87% | X   | 10           |              |              | 11,12        | 11,13       |              | 8,11            | 13              |              |       |                |    |
| CVCL_1257       | HCC1599 BL     | 8 | 60.87% | X   | 12,13        |              |              | 12           | 10,11       |              | 8,11            | 12,13           |              |       |                |    |
| CVCL_3317       | HMCB           | 8 | 60.87% | X   | 10           |              |              | 11,12        | 11,13       |              | 8,11            | 13              |              |       |                |    |
| CVCL_0731       | Hs 364.Ct      | 8 | 60.87% | X,Y | 12           |              |              | 12           | 11,12       |              | 11              | 10,13           |              |       |                |    |
| CVCL_0803       | Hs 573.Lu      | 8 | 60.87% | X   | 12           |              |              | 12,13        | 11,12       |              | 10,11           | 9,12            |              |       |                |    |
| CVCL_0804       | Hs 573.T       | 8 | 60.87% | X,Y | 12           |              |              | 12,13        | 11,12       |              | 10,11           | 9,12            |              |       |                |    |
| CVCL_1340       | KP-N-S19s      | 8 | 60.87% | X,Y | 10           |              |              | 13           | 8,11        |              | 11,14           | 9,13            |              |       |                |    |
| CVCL_1T57       | PCI-22B        | 8 | 60.87% | X   | 10,12        |              |              | 10,12        | 10,11       |              | 12              | 9               |              |       |                |    |
| CVCL_G366       | SKR1           | 8 | 60.87% | X   | 10,12        |              |              | 10,12        | 10,11       |              | 12              | 9               |              |       |                |    |
| CVCL_IR64       | U3019MG        | 8 | 60.87% | X   | 10,12        |              | 17,19        | 12           | 9,11        | 13,14        | 14              | 10              | 13,14        | 14    | 31.2,32.2      | 18 |
| CVCL_0207 Best  | CCRF-CEM       | 9 | 60.00% | X   | <u>10,11</u> | 24           | <u>14,15</u> | <u>12,13</u> | <u>9,12</u> | <u>12,13</u> | <u>11</u>       | <u>10,13</u>    | 13,18        | 14,15 | <u>30,33.2</u> | 23 |
| CVCL_0207 Worst | CCRF-CEM       | 9 | 50.00% | X   | <u>11</u>    | 24           | <u>15,16</u> | <u>12,13</u> | <u>9,13</u> | <u>13</u>    | <u>10,11,12</u> | <u>10,13,14</u> | 13,18        | 14,15 | <u>30,33.2</u> | 23 |
| CVCL_A5RK       | CD#59 ipsC     | 9 | 60.00% | X   | 11,12        |              |              | 10,12        | 9,11        |              | 8,11            | 11,12           |              |       | 30,31.2        |    |
| CVCL_VG71       | CGBC 01        | 9 | 60.00% | X   | 10,13        | 23,24        | 15,16        | 9,12         | 9,11        | 13,14        | 8,9             | 11,13           | 13,14        | 14    | 30,32.2        | 23 |
| CVCL_0P14       | GM00059        | 9 | 60.00% | X   | 11,12        |              |              | 10,12        | 9,11        |              | 8,11            | 11,12           |              |       | 30,31.2        |    |
| CVCL_B187       | HUES 53        | 9 | 60.00% | X,Y | 12,13        | 17,23        | 15,16        | 11,12        | 11,12       | 12,14        | 11,12           | 11,12           | 15,20        | 14    | 30,31.2        | 21 |
| CVCL_UN03       | ICCSIC006-A    | 9 | 60.00% | X,Y | 10,12        |              |              | 11,12        | 11,12       |              | 8,11            | 9,13            |              |       | 30,31.2        |    |
| CVCL_VX34       | OCC-06         | 9 | 60.00% | X,Y | 10,12        | 23,25        | 16,17        | 12           | 8,12        | 10,12        | 11,12           | 9,13            | 15,23        | 12,14 | 28,30          | 24 |
| CVCL_5216       | PMC42-LA       | 9 | 60.00% | X   | 10,12        |              | 15           | 11,12        | 7,9         | 13           | 11,14           | 9,11            | 14,17        |       | 30,31.2        | 20 |
| CVCL_4020       | SK-RC-35       | 9 | 60.00% | X   | 11,12        | 23,24        | 17           | 12           | 8,9         | 11,13,14     | 11,12           | 10,13           | 12,19        | 14    | 30,32.2        | 21 |
| CVCL_5133       | HCC2450        | 8 | 60.00% | X,Y | 13           |              |              | 12           | 9           |              | 11              | 11,13           |              |       |                |    |
